# Supplementary material
Source: publisher figshare collection journal article supplement (https://gsapubs.figshare.com/articles/dataset/_/25828987)
Supplement: Supplementary file 1 [file 1]

## Sheet: Table S4
Table S4. Detrital zircon U-Pb data from the QN section
ZZ1						Isotopic Ratios + measurement Uncertainty (2s)									Ages uncorrected for common lead + measurement Uncertainty (2s)
						Data for Tera-Wasserburg plot				Data for Wetherill plot
Sample	Is rejected?	% common lead (f206c)	206Pb (mV)	U (ppm)	U/Th	238U/206Pb	238U/206Pb Uncertainty ( % 2s)	207Pb/206Pb	207Pb/206Pb Uncertainty (% 2s)	207Pb/235U	207Pb/235U Uncertainty (% 2s)	206Pb/238U	206Pb/238U Uncertainty (% 2s)	r	Age 206Pb/238U	Age 206Pb/238U measurement Uncertainty (2s)	Age 207Pb/235U	Age 207Pb/235U measurement Uncertainty (2s)	Age 207Pb/206Pb	Age 207Pb/206Pb measurement Uncertainty (2s)	Discordance 206Pb/238U vs 207Pb/235U (%)	Discordance 206Pb/238U vs 207Pb/206Pb (%)	Distance to Concordia	Best age (Concordia)	Best age measurement Uncertainty (2S)	Best age Systematic Uncertainty (2S)
Z-1	0	0.261894	5391.33	333.918	0.600882	14.6882	2.44258	0.05416	3.0419	0.508184	3.9012	0.0680817	2.44258	0.62611	424.588	10.0368	417.227	13.3481	376.707	62.1786	-1.76422	-12.7104	-1.82413	423.43	9.90065	11.0911
Z-2	0	0.146184	17541	919.168	10.3254	14.4393	2.7851	0.0553859	2.58781	0.528647	3.80179	0.0692555	2.7851	0.732578	431.668	11.6287	430.911	13.3506	426.843	57.1488	-0.175729	-1.13043	-0.16806	431.48	11.3939	12.4882
Z-3	0	0.166297	3846.48	248.807	0.374736	15.1812	3.38205	0.0552387	4.46974	0.501475	5.60507	0.0658709	3.38205	0.603392	411.231	13.4737	412.7	19.0105	420.903	101.892	0.35599	2.29783	0.385932	411.401	13.3591	14.2314
Z-4	0	0.0653042	14152.1	294.122	0.349746	6.15797	4.0906	0.0716445	2.71842	1.60346	4.9115	0.162391	4.0906	0.832861	970.051	36.8396	971.56	30.7244	974.982	55.6276	0.155236	0.505749	0.16806	971.566	30.7148	32.3312
Z-5	0	3.99052	52767.5	553.787	1.55041	6.58386	6.83704	0.102859	19.0077	2.15315	20.1999	0.151887	6.83704	0.338469	911.53	58.116	1166.07	140.957	1675.52	715.083	21.8287	45.5972	39.5437	Discordant	Discordant	Discordant
Z-6	0	0.00372688	11327.4	674.672	4.50707	14.5656	2.31202	0.0572318	2.62182	0.541528	3.49563	0.0686549	2.31202	0.661405	428.047	9.57512	439.432	12.4694	499.539	67.4145	2.59086	14.3116	2.81949	429.548	9.49073	10.7936
Z-7	0	0.243283	3311.96	333.897	0.381406	24.7478	2.95608	0.0575868	4.62875	0.320699	5.49215	0.0404076	2.95608	0.538238	255.359	7.40107	282.44	13.5423	513.118	750.105	9.58838	50.2339	11.5289	255.231	7.40102	8.0966
Z-8	0	0.0126529	67736.9	449.206	0.782131	3.3164	3.25329	0.119141	3.02641	4.95116	4.44332	0.301532	3.25329	0.732176	1698.9	48.5869	1811.02	37.5526	1942.59	58.8586	6.19123	12.5447	6.70785	1799.47	37.8111	40.6545
Z-9	0	0.0758555	10068	672.129	2.47849	15.9764	2.75484	0.0568617	3.22471	0.490517	4.24122	0.0625925	2.75484	0.64954	391.372	10.4609	405.263	14.1731	485.193	89.7752	3.42757	19.3368	3.81056	392.748	10.4021	11.4388
Z-10	0	0.181314	3362.88	287.667	0.543136	19.3004	4.28377	0.0527461	4.23213	0.376649	6.02176	0.0518125	4.28377	0.711381	325.64	13.6032	324.57	16.7304	316.878	93.9299	-0.329745	-2.76515	-0.329024	325.473	13.4611	14.0287
Z-11	0	0.0686104	13549.3	733.283	0.497503	14.3643	2.79527	0.0564194	2.74012	0.541324	3.91431	0.0696172	2.79527	0.714116	433.849	11.7282	439.297	13.9597	467.947	65.112	1.24011	7.28671	1.25087	434.953	11.5511	12.6549
Z-12	0	0.423374	3199.97	328.462	0.744699	23.8889	2.69098	0.0523822	3.29288	0.302204	4.25258	0.0418604	2.69098	0.632787	264.354	6.96983	268.12	10.0211	301.119	85.9991	1.40447	12.2094	1.49932	264.615	6.9485	7.68213
Z-13	0	0.0960379	10982.7	666.651	0.688714	14.7754	2.99374	0.0560955	2.53323	0.523239	3.9217	0.06768	2.99374	0.763379	422.163	12.2335	427.313	13.6793	455.205	60.3246	1.20517	7.25869	1.1402	423.522	11.9996	13.0158
Z-14	0	0.320956	4520.39	119.015	0.580227	7.4735	1.42081	0.0629487	2.90115	1.16085	3.23039	0.133806	1.42081	0.439828	809.542	10.8092	782.353	17.623	705.551	55.9205	-3.47527	-14.7389	-4.27829	805.759	10.5854	13.6198
Z-15	0	0.381445	5626.97	437.123	0.841778	17.4118	2.03558	0.05031	3.08556	0.398221	3.69652	0.0574324	2.03558	0.550673	359.992	7.12705	340.357	10.6902	208.321	51.2649	-5.76888	-72.8059	-5.88772	Discordant	Discordant	Discordant
Z-16	0	0.16105	3990.15	170.011	0.368081	11.0607	1.41157	0.0587991	2.95125	0.732658	3.27145	0.0904104	1.41157	0.431482	557.964	7.54484	558.112	14.0471	558.718	64.4135	0.0265682	0.134925	0.0309298	557.98	7.49366	9.86743
Z-17	0	0.00671403	14690.9	835.912	0.550593	14.3051	1.75894	0.0561334	2.15378	0.540807	2.78077	0.0699051	1.75894	0.632539	435.584	7.40856	438.957	9.91066	456.661	49.8854	0.768334	4.61544	0.823478	436.057	7.33064	8.97437
Z-18	0	0.0718939	17254.7	1031.67	0.603536	16.9051	1.57917	0.0555899	2.24064	0.4532	2.74122	0.0591536	1.57917	0.576085	370.476	5.68553	379.518	8.68057	435.038	58.8945	2.38236	14.8404	2.68002	371.128	5.66214	7.23489
Z-19	0	0.0143654	6397.33	696.599	0.312826	25.1272	1.58092	0.0522486	3.00772	0.286578	3.3979	0.0397975	1.58092	0.465264	251.578	3.90064	255.862	7.6852	295.3	81.6196	1.67454	14.8061	1.85913	251.689	3.89655	4.99834
Z-20	0	0.00643969	13373.4	228.552	0.341627	5.49368	2.72004	0.0757549	2.40932	1.90046	3.63366	0.182027	2.72004	0.748568	1078.04	27.0024	1081.25	24.1795	1087.73	48.6004	0.296922	0.890399	0.268831	1080.33	23.6168	26.0233
Z-21	0	14.5681	339.93	12.445	0.538317	20.9587	5.15765	0.0151675	28.3831	0.099738	28.8479	0.0477128	5.15765	0.178788	300.464	15.1413	96.5344	26.5714		38.0827	-211.251			248.446	13.6715	13.774
Z-22	0	0.0380915	12039	673.052	0.620682	13.8145	1.54991	0.0552523	2.40185	0.551222	2.85851	0.0723875	1.54991	0.542208	450.524	6.74429	445.797	10.3142	421.455	50.7321	-1.06031	-6.89729	-1.17705	450.041	6.68305	8.52238
Z-23	0	0.003621	125460	1117.94	3.85427	4.51455	1.86711	0.101445	2.05026	3.09691	2.77303	0.221506	1.86711	0.673312	1289.83	21.8263	1431.93	21.2873	1649.9	45.824	9.92348	21.8237	12.1039	Discordant	Discordant	Discordant
Z-24	0	0.0825897	35790.7	237.852	0.697093	3.07322	3.37876	0.111959	1.96439	5.02084	3.90831	0.325392	3.37876	0.864508	1816.01	53.4734	1822.84	33.1049	1830.65	35.7716	0.37503	0.799701	0.752352	1826.18	29.6103	33.3013
Z-25	0	0.0104835	6712.78	761.693	0.416486	25.3465	1.86642	0.0521742	2.91738	0.283693	3.46332	0.0394531	1.86642	0.538911	249.442	4.56672	253.583	7.77176	292.04	78.9715	1.63301	14.5863	1.79038	249.596	4.5597	5.51641
Z-26	0	0.0925462	10630.6	68.6168	0.757333	3.15679	1.74574	0.113063	2.48525	4.93616	3.03712	0.316778	1.74574	0.574803	1773.97	27.0733	1808.46	25.6488	1848.43	46.0616	1.90698	4.02795	2.21889	1792.76	23.51	28.0325
Z-27	0	0.000438867	70765.1	221.772	0.542296	2.10799	3.85001	0.163462	2.14726	10.6871	4.40832	0.474385	3.85001	0.87335	2502.76	79.8546	2496.3	40.9536	2491.04	36.0959	-0.258771	-0.470656	-0.584161	2493.06	33.0249	37.5162
Z-28	0	0.215757	2288.82	209.619	0.757566	22.754	3.42789	0.056042	4.67816	0.339443	5.79962	0.0439482	3.42789	0.591054	277.26	9.30267	296.75	14.9246	453.044	232.263	6.56783	38.8007	7.6458	277.633	9.29909	9.93731
Z-29	0	0.172613	4734.88	464.197	0.393059	23.4251	2.57529	0.0572351	5.71022	0.336739	6.26408	0.0426893	2.57529	0.41112	269.481	6.79686	294.698	16.024	499.667	473.41	8.55688	46.0679	10.2306	269.514	6.7968	7.61792
Z-30	0	0.561338	1429.86	139.703	0.195178	22.1501	4.02934	0.0481991	6.06343	0.299899	7.28016	0.0451465	4.02934	0.553469	284.655	11.2202	266.321	17.056	108.047	89.4739	-6.88393	-163.454	-6.83645	282.67	11.1176	11.6224
Z-33	0	0.0189865	3568.07	248.434	0.551821	17.0997	2.59164	0.0587543	4.43886	0.473547	5.14005	0.0584806	2.59164	0.504206	366.379	9.23043	393.636	16.774	557.071	172.79	6.92461	34.2313	8.39819	367.011	9.22327	10.2865
Z-34	0	0.0404629	30866.7	1657.72	4.87117	14.1069	2.80658	0.0555767	2.36517	0.542967	3.67028	0.0708873	2.80658	0.764678	441.499	11.9762	440.379	13.1151	434.508	51.9535	-0.254341	-1.60897	-0.228883	441.14	11.6679	12.7803
Z-35	0	0.0364908	36412.8	501.868	9.30268	6.85453	3.87442	0.122383	2.2517	2.46068	4.48121	0.145889	3.87442	0.864592	877.877	31.7983	1260.56	32.3643	1990.46	135.11	30.3583	55.8959	130.989	Discordant	Discordant	Discordant
Z-36	0	0.0668412	5452.43	723.439	0.50684	29.4802	2.89589	0.0533942	2.86913	0.249618	4.07653	0.033921	2.89589	0.71038	215.042	6.12465	226.266	8.26853	344.609	141.968	4.96027	37.5981	5.46928	215.418	6.12118	6.70388
Z-37	0	0.435966	2402.89	249.513	0.194138	23.9786	2.00649	0.052272	3.08387	0.30044	3.67917	0.0417039	2.00649	0.545366	263.386	5.1783	266.744	8.63092	296.311	79.4565	1.2589	11.1117	1.37671	263.534	5.16798	6.1119
Z-38	0	0.0483852	12444.9	764.854	1.13223	15.0082	2.01121	0.0572129	1.71921	0.525383	2.64587	0.0666301	2.01121	0.760131	415.821	8.099	428.741	9.25354	498.767	45.7071	3.01353	16.6303	3.01271	418.577	7.98985	9.43332
Z-39	0	0.102854	15185.9	804.514	0.61468	13.892	4.02796	0.0560314	2.08206	0.555878	4.53426	0.0719839	4.02796	0.88834	448.097	17.4362	448.84	16.4504	452.626	46.6351	0.165453	1.00053	0.139203	448.661	16.3339	17.1703
Z-40	0	0.0540096	229722	636.753	0.719295	2.24655	4.18401	0.190997	1.90645	11.7172	4.59788	0.445128	4.18401	0.909987	2373.55	83.0786	2582.07	43.0407	2750.04	33.7256	8.07568	13.6902	21.0459	Discordant	Discordant	Discordant
Z-41	0	0.0405686	3037.15	181.734	0.558392	14.6902	5.00605	0.0587227	3.41255	0.550921	6.05855	0.0680724	5.00605	0.826278	424.532	20.5676	445.6	21.8557	555.877	100.793	4.72798	23.6285	4.47566	430.537	20.2308	20.8751
Z-42	0	0.106262	9316.69	397.611	1.70899	10.6956	4.89463	0.0617299	2.73381	0.795433	5.60634	0.0934966	4.89463	0.873051	576.183	26.9784	594.249	25.2251	663.853	66.8869	3.04012	13.2062	2.61309	589.49	25.0949	25.9664
Z-43	0	0.120166	9568.71	765.432	4.69488	18.8541	2.5029	0.0541123	2.32562	0.395552	3.41658	0.053039	2.5029	0.732575	333.152	8.12666	338.417	9.83313	374.725	58.9007	1.5557	11.0943	1.57016	333.983	8.0552	9.02397
Z-44	0	0.299968	10584.1	509.847	0.844649	12.9594	2.84422	0.0638028	3.78954	0.678528	4.73816	0.0771642	2.84422	0.600279	479.174	13.1345	525.884	19.4505	734.198	139.9	8.88226	34.735	11.222	Discordant	Discordant	Discordant
Z-45	0	0.0226094	102995	414.107	0.656756	2.3892	2.74726	0.146872	2.22986	8.47227	3.53832	0.418551	2.74726	0.776431	2253.9	52.2543	2282.96	32.1454	2309.06	38.7568	1.27285	2.38902	2.01977	2289.79	30.9119	35.241
Z-46	0	0.307879	23575.1	999.048	1.05709	13.4881	3.88865	0.0642498	2.46522	0.656497	4.60423	0.0741394	3.88865	0.844582	461.046	17.3024	512.469	18.5301	748.924	103.771	10.0344	38.4389	11.3174	Discordant	Discordant	Discordant
Z-47	0	0.0257357	9562.69	627.177	0.86284	15.1268	2.65846	0.0569391	2.40442	0.518771	3.5845	0.0661078	2.65846	0.741654	412.664	10.6267	424.33	12.4327	488.208	63.0029	2.74932	15.4738	2.795	414.92	10.4953	11.6148
Z-48	0	0.140863	60609.6	1246.21	5.95987	7.25969	3.12523	0.0712256	2.16616	1.35217	3.80254	0.137747	3.12523	0.82188	831.909	24.3914	868.494	22.1991	963.026	50.1512	4.21253	13.6151	3.76705	858.36	22.0739	23.8748
Z-49	0	0.00732284	354697	631.184	5.2136	1.68644	2.18092	0.24133	2.03456	19.7221	2.98259	0.592966	2.18092	0.731216	3001.44	52.3336	3077.83	28.831	3128.06	32.9189	2.48204	4.04792	4.09299	3093.11	27.444	33.2212
Z-50	0	0.246705	10594.8	633.134	0.512445	14.0468	2.94982	0.0574028	2.51138	0.563208	3.87408	0.0711907	2.94982	0.761426	443.325	12.6378	453.612	14.1735	506.073	62.8808	2.2678	12.399	2.20526	445.901	12.4107	13.4929
Z-51	0	0.358301	3060.9	203.342	0.419867	16.7375	2.5748	0.0565742	4.73545	0.465843	5.39019	0.059746	2.5748	0.477683	374.081	9.35769	388.313	17.3952	474.015	136.283	3.66529	21.0826	4.3149	374.601	9.33992	10.399
Z-52	0	0.024772	15748.6	911.193	9.08757	14.3255	1.88976	0.0553943	2.33541	0.532928	3.00422	0.0698057	1.88976	0.629035	434.985	7.94899	433.751	10.6053	427.182	51.2703	-0.284501	-1.8266	-0.303768	434.815	7.85412	9.38904
Z-53	0	0.104926	13474.1	758.288	0.759532	13.3425	1.78922	0.0571626	2.46389	0.590455	3.04501	0.0749485	1.78922	0.58759	465.9	8.04185	471.158	11.4789	496.868	57.575	1.11603	6.23257	1.24556	466.509	7.96814	9.68667
Z-54	0	0.0429859	193380	1194.71	0.40829	3.07271	2.17438	0.102592	2.07341	4.60157	3.00449	0.325446	2.17438	0.723711	1816.27	34.4169	1749.55	25.066	1670.72	36.5617	-3.81341	-8.71172	-4.30277	1749.27	25.0678	29.3121
Z-55	0	0.509905	6049.36	72.2031	0.721552	4.59714	2.48497	0.0870024	2.57192	2.60829	3.57629	0.217527	2.48497	0.694846	1268.79	28.6203	1302.97	26.2551	1359.69	52.0438	2.62334	6.68514	2.55031	1289.86	25.2515	28.1346
Z-56	0	0.113878	7327.39	416.404	0.59822	14.4957	2.70475	0.0627319	3.06644	0.596433	4.08885	0.0689861	2.70475	0.661493	430.044	11.2521	474.968	15.5123	698.229	131.981	9.45822	38.4093	11.7808	Discordant	Discordant	Discordant
Z-57	0	0.0454337	3049.85	1764.54	0.881575	141.927	1.58506	0.0519193	4.13873	0.0504169	4.43188	0.00704588	1.58506	0.35765	45.2614	0.714907	49.9438	2.15989	280.883	25.0486	9.37532	83.886	10.2015	45.2065	0.714588	0.9361
Z-58	0	0.0208843	6146.22	150.377	0.572269	7.03978	1.62293	0.068514	3.44151	1.34132	3.80498	0.14205	1.62293	0.426527	856.244	13.0129	863.802	22.1372	883.231	72.9244	0.875002	3.05548	1.1644	857.072	12.8185	15.7876
Z-59	0	0.214755	7595.63	548.67	0.628866	16.089	2.3073	0.0544301	3.75782	0.466255	4.40963	0.0621545	2.3073	0.523241	388.715	8.70377	388.599	14.2389	387.887	84.2158	-0.0297988	-0.213313	-0.0315849	388.7	8.65761	9.82876
Z-60	0	0.610697	3244.75	210.23	0.992908	15.3569	2.6771	0.0515447	3.12556	0.462586	4.11533	0.0651173	2.6771	0.650518	406.671	10.5507	386.055	13.2169	264.263	54.2136	-5.34037	-53.889	-5.07894	Discordant	Discordant	Discordant
Z-61	0	0.248784	7071.74	459.638	0.903152	14.7698	1.86258	0.0548545	2.25092	0.511857	2.92162	0.0677056	1.86258	0.637516	422.318	7.61387	419.697	10.044	405.301	48.6523	-0.624374	-4.19857	-0.65051	421.912	7.52024	9.03167
Z-62	0	0.2304	9969.56	593.739	0.896378	13.7987	1.70318	0.0565139	2.42466	0.564455	2.96307	0.0724707	1.70318	0.574802	451.024	7.41916	454.422	10.8556	471.642	55.8665	0.747911	4.37173	0.832135	451.398	7.35658	9.09101
Z-63	0	0.153361	3481.22	211.025	0.936422	16.0439	36.317	0.0635496	9.6838	0.545902	37.5859	0.062329	36.317	0.96624	389.774	137.36	442.309	135.568	725.731	667.763	11.8774	46.2922	14.3853	Discordant	Discordant	Discordant
Z-64	0	0.151052	3854.48	463.417	0.463077	25.9065	2.24478	0.0523963	3.37533	0.278743	4.05362	0.0386003	2.24478	0.553771	244.151	5.37818	249.66	8.97233	301.728	98.0591	2.20639	19.0823	2.42238	244.352	5.37101	6.17651
Z-65	0	0.0130056	7337.68	418.755	0.463811	13.0481	2.95005	0.0580981	2.18149	0.61366	3.66902	0.0766397	2.95005	0.804044	476.034	13.5373	485.865	14.1685	532.512	53.1362	2.02352	10.606	1.7961	479.665	13.1438	14.3002
Z-67	0	0.1105	8060.2	470.495	0.913563	13.4194	2.23942	0.0564792	2.22194	0.580054	3.15468	0.0745191	2.23942	0.709872	463.325	10.0117	464.496	11.7598	470.313	49.8274	0.252241	1.486	0.250863	463.588	9.81727	11.2321
Z-68	0	0.0862878	15405.3	945.254	0.745459	15.3248	1.4141	0.0562486	2.43212	0.505859	2.81334	0.0652538	1.4141	0.502641	407.498	5.58407	415.661	9.59645	461.209	60.8971	1.96393	11.6458	2.27392	407.974	5.56286	7.41553
Z-69	0	0.0582306	10315.2	607.094	0.725572	14.115	2.23616	0.0585633	2.16418	0.571815	3.11193	0.0708464	2.23616	0.718577	441.253	9.53698	459.187	11.4956	549.969	59.7052	3.90571	19.7677	4.16845	444.199	9.43834	10.8322
Z-70	0	0.299553	1020.96	102.925	0.438899	22.6751	3.84222	0.051214	5.38754	0.31128	6.61727	0.0441012	3.84222	0.580635	278.204	10.4618	275.173	15.9515	249.455	113.145	-1.10166	-11.5246	-1.16166	277.978	10.4156	10.9566
Z-71	0	3.10117	262.45	150.785	0.461426	134.688	4.00622	0.0289543	10.1442	0.0296276	10.9066	0.00742457	4.00622	0.36732	47.6851	1.90332	29.6464	3.18668	0	7.69802	-60.8463	103.753	-42.6204	44.8615	1.84413	1.90932
Z-72	0	0.265262	3455.95	172.2	0.762035	14.4425	8.79374	0.0690518	14.585	0.658937	17.0309	0.0692399	8.79374	0.516341	431.575	36.7091	513.964	68.7931	899.371	1737.29	16.0301	52.0137	22.2382	Discordant	Discordant	Discordant
Z-73	0	0.00931391	19878.7	537.047	0.888697	7.57746	2.38052	0.0710157	1.87032	1.29164	3.02737	0.13197	2.38052	0.786331	799.096	17.8908	842.026	17.3274	956.958	44.8778	5.09848	16.4962	4.65926	821.537	16.7771	18.9806
Z-74	0	0.714828	2636.42	95.8361	0.537855	14.2034	1.85403	0.0871152	9.76592	0.845306	9.94035	0.0704057	1.85403	0.186515	438.599	7.86128	622.069	46.2677	1362.19	468.437	29.4935	67.8019	45.1369	Discordant	Discordant	Discordant
Z-75	0	0.0641659	8353.2	545.991	1.91264	14.5203	2.11552	0.0557734	2.1845	0.529375	3.04096	0.0688689	2.11552	0.695674	429.338	8.78687	431.394	10.6882	442.371	49.9099	0.47677	2.94618	0.483161	429.732	8.65612	10.0482
Z-76	0	0.0128113	9403.4	590.626	0.390021	14.87	2.00117	0.0588715	3.00769	0.545639	3.61261	0.0672494	2.00117	0.553942	419.563	8.12878	442.136	12.9501	561.379	91.7022	5.10552	25.2621	6.08257	420.785	8.10578	9.58341
Z-77	0	0.0410967	13648.6	824.597	0.887305	15.3352	2.42051	0.0577875	2.24338	0.519346	3.30024	0.0652095	2.42051	0.733434	407.229	9.55214	424.714	11.455	520.739	64.6119	4.11687	21.7978	4.37453	409.929	9.46897	10.6836
Z-78	0	0.367747	6619.3	423.61	1.20754	15.7756	2.88011	0.0596361	3.86253	0.520998	4.81811	0.0633891	2.88011	0.597767	396.203	11.0675	425.818	16.7592	589.473	141.548	6.95471	32.7869	8.36743	397.532	11.0483	12.0841
Z-79	0	0.0528198	14219.5	812.239	1.07359	15.1508	2.24655	0.0606028	2.34491	0.551277	3.2474	0.0660032	2.24655	0.691801	412.031	8.96686	445.833	11.7183	624.208	88.1631	7.58174	33.9914	8.97094	414.46	8.94218	10.288
Z-80	0	0.258901	6778.78	362.612	0.584198	13.4978	6.66329	0.061051	5.68292	0.623366	8.75757	0.0740863	6.66329	0.760861	460.728	29.6283	491.955	34.1589	640.115	179.955	6.34757	28.0242	6.90438	465.98	29.3579	29.8854
Z-81	0	0.0282556	46697.1	647.12	2.56726	6.58801	3.49956	0.119101	4.13069	2.49158	5.41383	0.151791	3.49956	0.646411	910.994	29.7306	1269.59	39.2467	1941.99	203.446	28.2449	53.0897	63.1472	Discordant	Discordant	Discordant
Z-82	0	0.00328162	42520.4	462.617	1.07379	4.10318	2.30681	0.094285	2.0205	3.1669	3.06656	0.243714	2.30681	0.752247	1405.97	29.14	1449.13	23.6691	1512.99	40.0728	2.97782	7.07319	3.02828	1443.57	23.6648	27.1078
Z-83	0	0.0163593	1091.52	104.962	0.671545	23.1038	3.94094	0.05726	8.00235	0.341571	8.92013	0.043283	3.94094	0.441803	273.151	10.5398	298.361	23.0644	500.624	619.895	8.44979	45.4379	10.1001	273.217	10.5396	11.1002
Z-84	0	0.0249129	5096.06	263.103	0.71131	12.5688	5.49512	0.0588911	3.16234	0.645754	6.34009	0.079562	5.49512	0.866726	493.508	26.1068	505.863	25.2649	562.101	78.0583	2.44231	12.203	1.98756	500.94	24.8214	25.4943
Z-85	0	1.28021	2660.17	239.634	1.27945	23.7766	6.34262	0.05195	7.96894	0.301126	10.1849	0.0420582	6.34262	0.622745	265.578	16.5023	267.279	23.9385	282.235	193.427	0.636535	5.90189	0.677026	265.696	16.4442	16.7681
Z-86	0	0.0505937	1217.06	123.058	0.662971	23.7791	4.7267	0.0566427	5.5706	0.328292	7.30571	0.0420537	4.7267	0.646988	265.55	12.2968	288.261	18.3361	476.665	395.209	7.87856	44.2899	9.27404	265.788	12.2954	12.7523
Z-87	0	0.0830804	28372.7	1125.59	0.582963	11.9271	2.7233	0.0600132	2.12841	0.693462	3.45637	0.0838425	2.7233	0.787908	519.017	13.5804	534.878	14.3723	603.087	53.2444	2.96536	13.9399	2.74682	524.469	13.1999	14.5446
Z-88	0	0.0691135	31493.9	195.774	1.32947	3.05093	3.6176	0.117157	1.77159	5.29235	4.0281	0.327769	3.6176	0.898091	1827.56	57.5685	1867.63	34.4138	1912.5	32.6536	2.14554	4.44158	5.03947	1893.18	27.4364	31.3133
Z-89	0	0.223573	8948.12	545.029	0.662614	13.9666	3.45557	0.0565097	2.26204	0.557629	4.13011	0.0715996	3.45557	0.836678	445.785	14.8839	449.982	15.0143	471.494	52.6884	0.932658	5.45258	0.766108	447.741	14.336	15.2796
Z-90	0	0.21666	4956.64	247.436	0.905765	12.5115	5.81285	0.0598099	4.55143	0.658833	7.38273	0.0799264	5.81285	0.787358	495.683	27.7334	513.9	29.7813	595.74	118.607	3.54476	16.7953	3.37091	501.262	27.0969	27.7279
Z-91	0	0.000156324	71325.6	3814.67	15.5092	12.0079	2.69688	0.0580678	2.26578	0.666469	3.52234	0.0832784	2.69688	0.765648	515.662	13.3651	518.563	14.3045	531.386	50.9471	0.559504	2.95914	0.505575	516.695	12.9348	14.2617
Z-92	0	0.0293868	29698.3	709.984	3.76282	8.64764	5.29003	0.089538	8.27519	1.42699	9.82157	0.115639	5.29003	0.538614	705.411	35.3472	900.293	58.7013	1414.84	463.784	21.6465	50.1421	36.5533	Discordant	Discordant	Discordant
Z-93	0	1.33055	10683.3	863.522	0.653903	34.8259	2.91981	0.0858274	3.27417	0.339653	4.38697	0.0287143	2.91981	0.665565	182.496	5.25383	296.909	11.2942	1333.44	19.5703	38.5346	86.3139	68.8037	161.667	4.98351	5.64407
Z-94	0	0.342989	22595	1007.97	1.18273	13.6508	8.23242	0.0631667	5.39446	0.637737	9.84241	0.0732557	8.23242	0.836424	455.74	36.223	500.904	38.9351	712.907	210.348	9.01642	36.073	9.8273	463.841	35.9634	36.3975
Z-95	0	0.968454	7801.8	661.174	0.426636	28.9955	4.90147	0.0731028	8.29588	0.347469	9.63567	0.0344881	4.90147	0.50868	218.577	10.5339	302.816	25.2347	1015.9	99.4943	27.8185	78.4845	39.9033	212.957	10.4316	10.8652
Z-96	0	0.154531	11327.9	671.087	0.350568	13.8682	2.41449	0.0570525	2.89188	0.56698	3.76733	0.0721075	2.41449	0.640904	448.84	10.4685	456.059	13.8419	492.588	69.607	1.58297	8.88115	1.71903	449.834	10.3598	11.6547
Z-97	0	0.264174	11893	367.359	0.572505	8.88218	4.11986	0.0668121	3.24042	1.03669	5.24152	0.112585	4.11986	0.786004	687.743	26.875	722.267	27.0966	831.023	80.6301	4.78	17.2414	4.44318	702.719	25.6885	26.859
Z-98	0	0.260779	4640.98	292.612	0.589289	16.1082	3.75551	0.059736	6.02506	0.511096	7.09966	0.0620802	3.75551	0.52897	388.264	14.1509	419.186	24.3872	593.104	233.611	7.37655	34.5369	9.02573	389.114	14.1374	14.935
Z-99	0	0.438471	4182.33	260.525	1.01011	14.8306	7.16502	0.0537059	4.6507	0.499085	8.54204	0.067428	7.16502	0.838795	420.641	29.1768	411.083	28.884	357.733	92.558	-2.32526	-17.5854	-1.8151	415.403	27.7736	28.2119
Z-100	0	0.274889	4664.82	305.607	0.546259	14.8541	4.29645	0.0538977	2.33182	0.500076	4.88844	0.0673215	4.29645	0.878899	419.998	17.4697	411.754	16.5486	365.774	47.1158	-2.00227	-14.8245	-1.63145	413.954	16.3585	17.093
Z-102	0	0.063567	36154.3	454.352	0.492585	4.64709	3.5317	0.0911399	2.23648	2.70296	4.18028	0.215189	3.5317	0.844848	1256.4	40.3161	1329.27	30.9928	1448.68	47.2619	5.48198	13.2727	7.70471	1344.03	30.2243	32.5863
Z-103	0	0.00863036	10002.2	822.944	1.33026	20.7695	1.74664	0.0539323	2.05037	0.357877	2.69347	0.0481475	1.74664	0.648472	303.138	5.17216	310.629	7.20813	367.219	56.9845	2.41148	17.4503	2.60759	303.738	5.1534	6.36799
Z-104	0	0.338088	1305.44	118.859	0.694138	22.5403	3.63361	0.0541899	5.41273	0.331337	6.51926	0.0443649	3.63361	0.557365	279.832	9.95046	290.586	16.4759	377.947	177.147	3.70078	25.9601	4.17351	280.209	9.93809	10.5334
Z-106	0	0.00191518	70940.3	35736	7.46715	18.9926	2.2562	0.0520726	1.93288	0.377866	2.97094	0.0526521	2.2562	0.759424	330.784	7.27489	325.467	8.273	287.583	39.4556	-1.63371	-15.0218	-1.48281	329.452	7.14856	8.18469
Z-107	0	0.055592	4207.5	470.849	0.613659	25.7143	3.94043	0.0558127	3.67873	0.299137	5.39074	0.0388889	3.94043	0.730964	245.942	9.50863	265.726	12.6042	443.937	276.3	7.44535	44.5998	8.61756	246.238	9.50735	10.0122
Z-108	0	0.0855724	14844.7	487.043	0.758419	8.62879	2.81674	0.0642499	2.06406	1.02621	3.49204	0.115891	2.81674	0.806616	706.871	18.8579	717.028	17.96	748.928	45.7768	1.41665	5.6157	1.20166	713.115	17.4716	19.1709
Z-109	0	0.463859	3437	274.431	0.239994	20.9337	4.17702	0.0571554	6.66562	0.376291	7.86626	0.0477699	4.17702	0.531005	300.815	12.2765	324.305	21.8413	496.568	333.81	7.24311	39.4211	8.60249	301.162	12.2729	12.8462
Z-110	0	0.000570923	62288.7	475.607	0.658114	3.36277	3.29913	0.106777	1.99868	4.37614	3.85733	0.297374	3.29913	0.85529	1678.27	48.7478	1707.84	31.8919	1744.29	37.4896	1.73159	3.78507	3.22634	1720.61	29.2714	32.6738
Z-111	0	0.0881728	12636.2	284.957	1.5201	6.43622	2.80402	0.0692287	2.28914	1.48241	3.61976	0.155371	2.80402	0.774641	931	24.3079	923.216	21.9519	904.644	46.1823	-0.84315	-2.91338	-0.742552	925.336	21.4829	23.5912
Z-112	0	0.545604	2580.77	303.211	0.573616	25.8702	3.29644	0.0480462	4.09785	0.25596	5.25917	0.0386545	3.29644	0.626799	244.488	7.90847	231.406	10.8833	100.505	61.6827	-5.65322	-143.259	-5.43995	242.811	7.83521	8.37411
Z-113	0	0.00916236	99688.1	784.361	2.21183	3.49451	1.97369	0.097111	1.81526	3.82996	2.68153	0.286163	1.97369	0.736031	1622.33	28.3084	1599.06	21.5938	1568.53	33.3206	-1.45474	-3.42983	-1.57209	1599.97	21.5584	25.8589
Z-114	0	0.174294	1357.21	164.523	1.02885	26.2879	3.13439	0.0499075	4.93505	0.26165	5.84629	0.0380402	3.13439	0.536134	240.674	7.40459	235.996	12.3116	189.697	95.6676	-1.98222	-26.8727	-2.07571	240.396	7.38102	7.95106
Z-115	0	0.0207227	21581.2	171.854	0.362727	3.67811	3.41359	0.108243	2.93326	4.05589	4.50074	0.271878	3.41359	0.758452	1550.33	47.0391	1645.48	36.6768	1769.24	58.4337	5.78266	12.3731	6.32964	1639.03	36.8361	39.447
Z-116	0	0.0799507	7653.17	410.396	2.7841	12.531	2.92118	0.0562825	3.48394	0.619012	4.54656	0.079802	2.92118	0.642505	494.941	13.917	489.228	17.6525	462.586	73.0576	-1.16768	-6.99424	-1.20452	493.833	13.6612	14.8207
Z-117	0	0.123847	5830.04	381.892	1.14181	15.2204	2.36156	0.0552503	2.74041	0.500288	3.61757	0.0657012	2.36156	0.652804	410.204	9.38546	411.897	12.2494	421.373	62.6735	0.411001	2.65048	0.430454	410.458	9.2836	10.4954
Z-118	0	0.262616	13626.9	755.609	0.594974	14.1349	1.74448	0.0562757	2.12203	0.548706	2.74704	0.0707467	1.74448	0.63504	440.653	7.43027	444.148	9.8828	462.318	49.1291	0.787017	4.68619	0.846257	441.14	7.34935	9.02121
Z-119	0	0.109039	9441.04	499.798	2.64403	13.6368	3.74273	0.0588149	3.31866	0.594413	5.00215	0.0733312	3.74273	0.748225	456.194	16.484	473.682	18.9376	559.28	89.4055	3.69192	18.4319	3.78549	459.862	16.2525	17.1482
Z-120	0	0.0278881	17657.6	686.098	10.8952	10.484	2.97594	0.0586308	2.7165	0.770744	4.02934	0.0953832	2.97594	0.738566	587.296	16.705	580.189	17.81	552.471	56.4526	-1.22483	-6.30341	-1.09866	584.545	15.9964	17.3316
Z-121	0	0.0431666	5884.85	364.489	1.11368	14.7133	2.88904	0.0574259	3.04367	0.53791	4.19648	0.0679657	2.88904	0.688443	423.888	11.8523	437.046	14.9048	506.95	80.4711	3.01065	16.3846	3.2393	425.776	11.7426	12.8044
Z-122	0	1.01153	598.859	61.7919	0.548086	26.2389	2.45893	0.0508138	7.31333	0.2669	7.71564	0.0381114	2.45893	0.318694	241.116	5.81936	240.212	16.5062	231.365	162.725	-0.376134	-4.21456	-0.418604	241.109	5.81558	6.53526
Z-123	0	0.110112	4422.21	240.12	0.661405	13.5907	4.90984	0.0570625	2.66064	0.578657	5.58441	0.0735797	4.90984	0.879206	457.686	21.6925	463.598	20.7874	493.007	62.8326	1.2752	7.16437	1.03371	461.61	20.5278	21.2305
Z-124	0	0.399211	4022.26	471.261	0.649073	25.5906	2.80379	0.0503714	3.05349	0.271279	4.14548	0.0390768	2.80379	0.676349	247.108	6.79729	243.716	8.98238	211.139	62.2614	-1.39198	-17.036	-1.3888	246.721	6.75525	7.4072
Z-125	0	0.0968138	14194.3	814.054	6.12609	14.5634	3.09932	0.0578674	3.15589	0.547626	4.42328	0.0686653	3.09932	0.700683	428.11	12.8375	443.44	15.8938	523.772	85.5245	3.45719	18.2641	3.71425	430.399	12.7171	13.7248
Z-126	0	0.065503	7349.79	431.873	0.729816	14.1237	2.84337	0.0582545	3.34397	0.568451	4.38941	0.070803	2.84337	0.647779	440.992	12.1197	457.013	16.1546	538.373	90.0549	3.50554	18.0881	3.92293	442.842	12.029	13.1468
Z-127	0	0.0935859	17842.6	723.715	6.46211	11.0791	3.01349	0.0659727	3.64832	0.82068	4.73195	0.0902604	3.01349	0.636839	557.077	16.0826	608.428	21.6609	804.579	117.255	8.43993	30.7617	10.5857	Discordant	Discordant	Discordant
Z-128	0	1.04477	911.887	52.73	0.957462	14.196	2.79504	0.0484721	7.459	0.470584	7.96549	0.0704423	2.79504	0.350894	438.82	11.8571	391.592	25.8871	121.338	103.536	-12.0604	-261.652	-12.9979	Discordant	Discordant	Discordant
Z-129	0	1.08439	1634.86	204.456	0.663596	28.0463	3.95453	0.0426147	4.19585	0.209409	5.76572	0.0356553	3.95453	0.68587	225.846	8.77653	193.057	10.1373	0	35.4948	-16.9844	218.158	-13.1034	215.694	8.47358	8.87086
Z-130	0	0.000595821	42998.5	374.213	0.728986	3.52349	2.69458	0.0982517	1.91993	3.84308	3.30861	0.28381	2.69458	0.814415	1610.52	38.4004	1601.82	26.6645	1590.37	35.5929	-0.543262	-1.26678	-0.798711	1599.77	26.1593	29.7965
Z-131	0	0.140252	27127	618.657	1.20988	6.92312	3.11013	0.0722889	1.89059	1.43907	3.63968	0.144444	3.11013	0.854508	869.74	25.3047	905.333	21.8081	993.185	42.9532	3.93141	12.4291	4.12535	903.854	21.8297	23.7557
Z-132	0	0.119614	4179.39	399.085	0.680026	20.9733	2.32195	0.052702	3.49108	0.346316	4.19275	0.0476797	2.32195	0.553802	300.26	6.81203	301.946	10.9514	314.995	83.1064	0.558395	4.67784	0.610736	300.357	6.78981	7.72194
Z-133	0	0.100032	11068.6	704.693	1.17582	14.8904	2.793	0.0546908	2.38137	0.506199	3.67039	0.0671576	2.793	0.760954	419.008	11.3307	415.89	12.5257	398.606	51.1611	-0.749751	-5.11846	-0.678422	418.071	11.0567	12.1202
Z-134	0	0.124738	3987.5	220.01	0.657085	14.2782	3.42786	0.0593038	2.99766	0.57243	4.5537	0.070037	3.42786	0.752764	436.379	14.4634	459.585	16.8339	577.304	89.3966	5.04944	24.4109	5.36199	440.404	14.3214	15.2672
Z-135	0	0.00549058	87301.2	878.081	1.10375	4.26681	2.98043	0.0888052	2.15858	2.86845	3.68001	0.234367	2.98043	0.809899	1357.35	36.4796	1373.66	27.7138	1399.11	42.2274	1.18796	2.98495	1.48895	1375.45	27.5601	30.398
Z-136	0	0.804579	3843.64	377.137	1.60573	23.0795	3.57643	0.0502768	3.86541	0.300229	5.26614	0.0433284	3.57643	0.679137	273.431	9.57459	266.579	12.3474	206.805	72.9476	-2.57038	-32.2169	-2.51023	272.458	9.48673	10.0527
Z-137	0	0.0230164	6104.27	365.106	0.382551	13.8409	2.39682	0.0565338	2.78145	0.562931	3.67168	0.0722494	2.39682	0.652786	449.694	10.411	453.433	13.4287	472.453	64.3589	0.824567	4.81727	0.871565	450.294	10.2817	11.5804
Z-138	0	0.0233415	13740	152.071	0.878779	4.10618	5.34668	0.0871801	2.46487	2.92612	5.8875	0.243535	5.34668	0.908142	1405.05	67.5005	1388.69	44.5829	1363.62	46.5658	-1.17819	-3.03808	-2.65788	1377.47	38.9377	41.1045
Z-139	0	0.119815	11392.9	717.295	19.3624	15.3317	1.92023	0.0559055	2.24484	0.502546	2.95408	0.0652242	1.92023	0.650026	407.319	7.57947	413.424	10.0326	447.629	54.6002	1.47681	9.00521	1.58523	408.112	7.51189	8.96277
Z-140	0	0.451973	1369.2	118.862	0.431271	20.6208	2.11289	0.0514695	5.85869	0.343999	6.22805	0.0484948	2.11289	0.339254	305.274	6.29976	300.198	16.1874	260.914	118.618	-1.69093	-17.0016	-1.8979	305.164	6.29031	7.2966
Z-141	0	0.352369	2255.09	269.051	0.278799	25.9648	3.29592	0.0496495	3.61211	0.263538	4.88983	0.0385137	3.29592	0.674035	243.614	7.87949	237.514	10.356	177.582	67.0115	-2.56817	-37.1836	-2.51809	242.857	7.82135	8.37109
Z-142	0	0.0731974	36609.6	835.919	2.43844	7.46376	2.57518	0.0726397	2.09776	1.34131	3.32147	0.133981	2.57518	0.775314	810.535	19.6139	863.797	19.3234	1003.02	51.6478	6.16597	19.1902	5.89207	835.383	18.5576	20.6412
Z-143	0	0.167984	8361.92	488.517	0.92608	13.9551	2.32119	0.0565416	4.56693	0.558401	5.12297	0.0716582	2.32119	0.453096	446.138	10.0055	450.485	18.6409	472.736	106.54	0.964933	5.62638	1.13276	446.384	9.96355	11.2834
Z-144	0	0.0809724	24214.5	506.869	0.739025	6.65646	2.50492	0.0761112	2.19465	1.57586	3.33033	0.15023	2.50492	0.752153	902.253	21.0904	960.738	20.6906	1097.13	51.9922	6.08759	17.7621	5.96528	929.936	19.8026	22.114
Z-145	0	0.000842309	25364.7	487.702	1.76565	5.99071	2.14959	0.0715419	2.01017	1.64586	2.94304	0.166925	2.14959	0.730396	995.147	19.8222	987.966	18.5909	972.039	40.2998	-0.726851	-2.37725	-0.647523	990.656	17.7625	20.5102
Z-146	0	0.0515908	3696.09	439.49	0.516314	24.9306	2.56714	0.0512417	3.05125	0.283271	3.98752	0.0401114	2.56714	0.643792	253.523	6.38197	253.249	8.93775	250.691	69.4859	-0.108136	-1.12961	-0.114652	253.506	6.3551	7.08389
Z-147	0	0.082568	33102.2	334.724	366.507	3.9066	3.02649	0.0918311	1.98962	3.23969	3.62191	0.255977	3.02649	0.835605	1469.23	39.7628	1466.71	28.1091	1463.05	37.7027	-0.1716	-0.422191	-0.262804	1466	27.3801	30.52
Z-148	0	0.0369492	34736.9	767.63	1.19398	6.85384	2.09926	0.0699191	2.40408	1.40597	3.19163	0.145904	2.09926	0.657739	877.96	17.2307	891.457	18.9399	925.069	51.4778	1.514	5.09249	1.58916	882.694	16.3824	18.8997
Z-149	0	0.0323748	14011.5	814.66	0.586005	14.2865	3.52884	0.0553486	2.57134	0.533942	4.36629	0.0699962	3.52884	0.8082	436.133	14.8813	434.422	15.4334	425.341	56.1366	-0.393803	-2.53711	-0.330893	435.436	14.3796	15.2758
ZZ6						Isotopic Ratios + measurement Uncertainty (2s)									Ages uncorrected for common lead + measurement Uncertainty (2s)
						Data for Tera-Wasserburg plot				Data for Wetherill plot
Sample	Is rejected?	% common lead (f206c)	206Pb (mV)	U (ppm)	U/Th	238U/206Pb	238U/206Pb Uncertainty ( % 2s)	207Pb/206Pb	207Pb/206Pb Uncertainty (% 2s)	207Pb/235U	207Pb/235U Uncertainty (% 2s)	206Pb/238U	206Pb/238U Uncertainty (% 2s)	r	Age 206Pb/238U	Age 206Pb/238U measurement Uncertainty (2s)	Age 207Pb/235U	Age 207Pb/235U measurement Uncertainty (2s)	Age 207Pb/206Pb	Age 207Pb/206Pb measurement Uncertainty (2s)	Discordance 206Pb/238U vs 207Pb/235U (%)	Discordance 206Pb/238U vs 207Pb/206Pb (%)	Distance to Concordia	Best age (Concordia)	Best age measurement Uncertainty (2S)	Best age Systematic Uncertainty (2S)
Z-1	0	0.0778423	4328.83	266.031	0.469638	15.1465	2.60733	0.0557705	2.904	0.507464	3.90274	0.066022	2.60733	0.668078	412.145	10.4097	416.742	13.3408	442.253	68.9974	1.10328	6.80803	1.16246	412.827	10.2983	11.4187
Z-2	0	0.422829	2959.39	172.89	0.523453	14.5379	3.86911	0.0522592	3.70754	0.495421	5.35872	0.0687859	3.86911	0.722022	428.837	16.0523	408.598	18.028	295.772	65.915	-4.95324	-44.9891	-4.33412	422.372	15.5422	16.3194
Z-3	0	0.152634	7600.54	487.304	0.596156	15.1441	2.3428	0.0544764	2.56492	0.495767	3.47383	0.0660324	2.3428	0.674414	412.207	9.35493	408.833	11.6915	389.796	54.9178	-0.825478	-5.74946	-0.830388	411.585	9.2183	10.4347
Z-4	0	0.0725021	6323.57	391.296	0.137994	14.8035	2.57239	0.055497	2.78872	0.516675	3.79396	0.0675515	2.57239	0.678022	421.387	10.493	422.928	13.1242	431.31	63.4537	0.364153	2.30058	0.37317	421.659	10.3544	11.5049
Z-5	0	0.0683858	27515.7	1307.49	0.618345	13.8224	2.86928	0.0579061	4.97174	0.57737	5.74029	0.0723465	2.86928	0.49985	450.277	12.4788	462.77	21.3377	525.234	127.054	2.69949	14.2712	3.19552	451.03	12.4267	13.5437
Z-8	0	0.0378304	10362.7	617.748	0.459466	14.029	5.07158	0.055893	3.1002	0.549091	5.94409	0.0712811	5.07158	0.853214	443.869	21.7537	444.401	21.3967	447.134	69.339	0.119653	0.730144	0.0949769	444.176	20.7584	21.4116
Z-9	0	0.566573	488.364	51.866	0.239933	25.5261	5.07056	0.0496644	8.59396	0.268148	9.97832	0.0391757	5.07056	0.508158	247.721	12.3226	241.212	21.4267	178.282	158.315	-2.6987	-38.9489	-2.83793	247.365	12.2821	12.65
Z-10	0	0.0945634	13769.6	405.65	0.768673	8.8166	4.87456	0.0677697	5.24963	1.05937	7.1638	0.113422	4.87456	0.680444	692.593	32.0105	733.512	37.4354	860.597	134.014	5.57845	19.5218	6.3449	701.638	31.3377	32.3313
Z-11	0	0.0906051	12531	655.333	0.411904	13.1265	2.82559	0.0554161	2.52276	0.581834	3.78791	0.0761817	2.82559	0.745948	473.292	12.8941	465.639	14.148	428.057	51.891	-1.6434	-10.5675	-1.4748	470.764	12.4964	13.6589
Z-12	0	0.0472204	38685.5	308.423	0.403588	3.3298	2.18261	0.0962849	1.93359	3.98522	2.91591	0.300319	2.18261	0.748516	1692.89	32.4957	1631.19	23.6729	1552.5	34.5087	-3.78237	-9.04251	-4.40441	1628.58	23.7119	27.8583
Z-14	0	0.117143	8578.75	393.113	0.571629	10.935	1.88554	0.0566327	2.38631	0.713775	3.04134	0.0914495	1.88554	0.619971	564.104	10.1843	546.985	12.8625	476.299	46.4959	-3.12965	-18.4349	-3.19106	560.257	9.92475	11.7974
Z-15	0	0.0161767	24237.5	264.7	0.925063	4.25637	2.94461	0.0882793	2.21664	2.85846	3.68568	0.234942	2.94461	0.798933	1360.35	36.1127	1371.04	27.7315	1387.72	43.1254	0.779729	1.97209	0.92813	1371.72	27.6708	30.506
Z-16	0	0.0096934	63234.6	1227.86	0.561334	6.71196	1.87222	0.0672999	2.07471	1.3819	2.79458	0.148988	1.87222	0.669948	895.286	15.6499	881.25	16.4641	846.165	41.3933	-1.5928	-5.80516	-1.52941	889.18	14.5974	17.3668
Z-17	0	0.0936962	4268.26	413.307	0.389755	22.0803	2.68265	0.0528299	3.14775	0.329752	4.13581	0.0452893	2.68265	0.64864	285.536	7.49276	289.377	10.4141	320.529	80.4626	1.32731	10.9174	1.4062	285.867	7.46234	8.25121
Z-18	0	0.00443112	1384.89	139.673	0.589233	23.207	3.4031	0.052267	5.05817	0.310399	6.0964	0.0430904	3.4031	0.558214	271.96	9.06256	274.49	14.6639	296.106	125.627	0.921662	8.15449	1.00293	272.09	9.04003	9.64354
Z-19	0	0.0515843	6280.25	378.493	0.385775	14.3901	2.8519	0.0557188	2.52375	0.533644	3.80823	0.0694925	2.8519	0.748877	433.097	11.9457	434.225	13.4557	440.192	56.968	0.259827	1.61177	0.246943	433.389	11.6937	12.7725
Z-20	0	0.427573	5621.55	290.57	0.524962	14.6834	2.37576	0.0616089	6.11738	0.578268	6.56252	0.0681042	2.37576	0.36202	424.724	9.7652	463.348	24.4193	659.63	239.811	8.33586	35.6118	10.627	Discordant	Discordant	Discordant
Z-21	0	0.0680748	14306.4	764.589	0.510435	13.4835	1.93766	0.0552417	2.21203	0.564648	2.94068	0.0741649	1.93766	0.658916	461.199	8.62429	454.548	10.7759	421.026	45.863	-1.46341	-9.54182	-1.47469	459.862	8.46845	10.0388
Z-22	0	0.299415	2084.89	225.832	2.50855	23.9032	2.99294	0.0495521	4.29757	0.285704	5.23706	0.0418353	2.99294	0.571492	264.199	7.74748	255.173	11.8172	172.997	75.5448	-3.53739	-52.7188	-3.6165	263.419	7.70266	8.34334
Z-23	0	0.0430791	24942	1223.28	0.991335	14.0309	1.92948	0.0558934	2.11776	0.54902	2.86492	0.0712714	1.92948	0.673485	443.811	8.27513	444.354	10.3107	447.148	47.3723	0.122298	0.746358	0.127973	443.9	8.15229	9.6956
Z-24	0	0.0648454	20166.7	989.476	0.400726	14.1122	2.00018	0.0561417	2.25124	0.548281	3.01145	0.0708606	2.00018	0.664192	441.339	8.53217	443.87	10.8287	457.034	51.534	0.570258	3.43407	0.595895	441.761	8.42008	9.91385
Z-25	0	1.03388	2490.94	90.968	0.541828	20.5218	6.71912	0.119583	29.6007	0.803096	30.3538	0.0487287	6.71912	0.22136	306.712	20.1257	598.574	138.121	1949.21	262.561	48.7596	84.2648	83.9497	Discordant	Discordant	Discordant
Z-26	0	0.474807	1033.77	100.567	0.613031	23.1069	2.24137	0.0502498	3.37135	0.299713	4.04843	0.0432772	2.24137	0.55364	273.115	5.99365	266.176	9.47954	205.536	63.455	-2.60678	-32.8794	-2.72033	272.596	5.96479	6.82675
Z-27	0	1.57015	1556.05	142.044	0.281855	21.8148	2.76516	0.0407923	4.88191	0.257715	5.61063	0.0458405	2.76516	0.492843	288.934	7.81307	232.824	11.6739	0	38.5241	-24.0998	195.782	-20.7299	278.875	7.60963	8.25179
Z-29	0	0.0547699	19791.3	170.422	0.45169	3.67675	2.95961	0.0984975	2.97055	3.6921	4.19326	0.271979	2.95961	0.705801	1550.84	40.7951	1569.66	33.5155	1595.04	56.4617	1.19897	2.77117	1.188	1566.05	33.148	35.9824
Z-30	0	0.514822	928.127	80.6966	0.599211	22.0071	3.59937	0.0541359	7.25421	0.339028	8.09808	0.04544	3.59937	0.444471	286.465	10.0852	296.435	20.8218	375.708	226.099	3.36351	23.7534	3.85342	286.672	10.077	10.6885
Z-31	0	0.923286	3560.85	147.353	0.275981	14.2477	2.47578	0.0715003	10.5082	0.691633	10.7959	0.0701868	2.47578	0.229327	437.281	10.4671	533.781	44.8476	970.884	2414.54	18.0786	54.9605	25.1818	Discordant	Discordant	Discordant
Z-32	0	0.629113	17885.4	819.67	0.980671	16.263	6.15244	0.0695512	9.11367	0.589408	10.996	0.0614893	6.15244	0.559518	384.676	22.9747	470.49	41.4272	914.256	4117.41	18.2392	57.9246	25.7348	Discordant	Discordant	Discordant
Z-33	0	1.78227	1164.23	120.809	0.447839	25.0207	4.07178	0.0396407	6.86932	0.21835	7.98542	0.0399668	4.07178	0.509902	252.627	10.0875	200.536	14.5324	0	47.0866	-25.9764	167.292	-21.5458	242.489	9.80266	10.1948
Z-34	0	0.373033	5350.8	317.152	0.227245	14.1113	2.36184	0.0540919	2.94297	0.528294	3.77351	0.070865	2.36184	0.625901	441.365	10.0755	430.677	13.2455	373.875	58.2838	-2.48163	-18.0514	-2.53858	439.53	9.91603	11.1774
Z-35	0	0.25007	5873.27	547.645	0.443238	21.3969	2.70031	0.0513474	3.42884	0.330735	4.36447	0.0467358	2.70031	0.618704	294.45	7.77222	290.127	11.0146	255.459	70.2148	-1.48997	-15.2631	-1.5371	294.009	7.72257	8.51179
Z-36	0	0.0825541	10620.7	401.85	2.76003	10.537	6.41797	0.0613583	4.41516	0.802545	7.78999	0.0949038	6.41797	0.823874	584.474	35.8611	598.263	35.2309	650.905	104.538	2.30491	10.206	1.93929	591.79	34.0203	34.6826
Z-37	0	1.13496	4552.94	344.728	0.372629	24.0393	4.19429	0.0657946	3.34308	0.377208	5.3636	0.0415986	4.19429	0.781991	262.734	10.7983	324.982	14.9176	798.915	115.903	19.1542	67.1136	30.0346	250.953	10.6599	11.2272
Z-38	0	0.0755141	3221.18	212.556	0.216439	15.6402	3.10136	0.0550387	2.74624	0.484996	4.14249	0.0639378	3.10136	0.748669	399.529	12.0147	401.495	13.7382	412.8	63.2475	0.489547	3.21475	0.469019	399.993	11.8072	12.7386
Z-39	0	0.124189	10286.9	608.232	0.746286	14.2301	2.192	0.0566693	3.30917	0.548848	3.96932	0.0702736	2.192	0.552236	437.804	9.27804	444.242	14.283	477.706	79.4138	1.4493	8.35299	1.64947	438.357	9.21934	10.5938
Z-40	0	0.0198459	13778	1422.93	0.392243	27.334	2.13882	0.0526391	2.84485	0.26541	3.55918	0.0365845	2.13882	0.600931	231.627	4.86614	239.017	7.58008	312.259	94.7447	3.09195	25.8221	3.3957	231.886	4.86087	5.66636
Z-41	0	0.00343203	7461.75	419.033	0.419924	13.7222	2.61	0.058125	2.34636	0.583781	3.50963	0.0728744	2.61	0.743669	453.45	11.4284	466.889	13.1362	533.545	60.4567	2.87837	15.012	2.90372	456.412	11.252	12.489
Z-42	0	0.0225667	68361.4	1150.28	2.81968	5.99147	2.73704	0.0704614	2.51479	1.6208	3.71693	0.166904	2.73704	0.736371	995.031	25.2366	978.302	23.3446	940.948	49.5098	-1.70993	-5.74768	-1.50554	984.009	22.4151	24.6319
Z-43	0	0.102568	14009	825.525	23.5418	15.9586	3.73064	0.0541411	2.34026	0.467569	4.40392	0.0626623	3.73064	0.847119	391.796	14.1812	389.508	14.2477	375.921	50.8194	-0.587382	-4.22294	-0.466049	390.678	13.6529	14.4316
Z-44	0	0.078957	9833.36	562.427	0.456133	14.0297	3.10296	0.0559359	2.51632	0.549481	3.99503	0.0712771	3.10296	0.776706	443.845	13.3089	444.657	14.3862	448.837	56.4561	0.182516	1.11218	0.164514	444.107	12.9558	13.9791
Z-45	0	0.136593	9254.81	535.622	0.591244	13.7777	3.37706	0.0563251	2.9988	0.563428	4.51634	0.0725812	3.37706	0.747743	451.688	14.7316	453.755	16.5278	464.251	68.0848	0.4556	2.70604	0.431739	452.249	14.4035	15.3614
Z-46	0	0.0411616	9361.64	542.884	1.79664	15.0423	3.30295	0.0577826	3.09974	0.529414	4.52967	0.0664792	3.30295	0.729182	414.909	13.2725	431.421	15.9222	520.554	86.9298	3.82728	20.2946	4.04805	417.565	13.1466	14.0744
Z-47	0	0.0212448	15653.2	835.758	1.25192	13.9255	2.04568	0.0562565	2.73662	0.556767	3.41671	0.0718106	2.04568	0.598729	447.055	8.83542	449.42	12.4082	461.52	62.419	0.526283	3.13426	0.575173	447.35	8.75006	10.2265
Z-48	0	0.356199	2406.62	168.32	0.256008	17.6944	3.15061	0.0551372	4.78597	0.429458	5.72991	0.056515	3.15061	0.549854	354.397	10.8643	362.792	17.4811	416.798	126.562	2.31405	14.9716	2.61798	354.89	10.8289	11.6597
Z-49	0	0.0348566	15889.3	859.498	0.372003	14.4325	2.18099	0.0571477	2.52359	0.545719	3.33545	0.069288	2.18099	0.653882	431.865	9.11035	442.188	11.9576	496.284	63.793	2.33469	12.9803	2.54103	433.228	9.02804	10.4065
Z-50	0	0.0610426	11763.2	681.404	0.326098	14.2559	2.55644	0.055612	2.62106	0.537633	3.66133	0.0701464	2.55644	0.698227	437.038	10.8023	436.863	12.9995	435.92	58.2288	-0.0400504	-0.256526	-0.0396424	437	10.6208	11.8134
Z-51	0	0.0216946	27831.6	388.807	0.872029	7.07102	3.55744	0.114701	3.64227	2.23562	5.09132	0.141422	3.55744	0.698726	852.7	28.4137	1192.28	35.7339	1874.4	210.093	28.4819	54.5081	66.0201	Discordant	Discordant	Discordant
Z-52	0	0.00916663	10862	630.625	0.363305	14.2588	2.82991	0.0553502	2.29525	0.534995	3.6437	0.0701323	2.82991	0.776658	436.953	11.9556	435.119	12.8955	425.406	50.0361	-0.421353	-2.7142	-0.372695	436.333	11.6244	12.7194
Z-54	0	0.0168176	11844.9	658.151	0.49882	13.829	2.39782	0.0565461	2.94894	0.563538	3.80076	0.0723116	2.39782	0.630878	450.067	10.4237	453.826	13.9105	472.905	68.2402	0.828311	4.82914	0.894243	450.593	10.3081	11.6059
Z-55	0	0.0292567	4427.3	468.195	0.532811	23.0018	2.94371	0.0520289	3.61123	0.311742	4.65901	0.0434749	2.94371	0.631831	274.336	7.90624	275.531	11.2432	285.687	85.8179	0.433453	3.97317	0.45589	274.436	7.87349	8.56765
Z-56	0	0.0811047	41415.7	2050.78	0.783922	13.4234	2.21907	0.0567444	2.58654	0.582603	3.40801	0.0744969	2.21907	0.651136	463.191	9.91797	466.133	12.7395	480.629	59.0701	0.631145	3.62806	0.666646	463.68	9.78438	11.2077
Z-57	0	0.203303	10131.8	586.953	0.487935	13.72	4.04461	0.0539251	2.8889	0.541688	4.97038	0.0728863	4.04461	0.813743	453.522	17.7128	439.537	17.7344	366.918	55.6038	-3.18172	-23.6028	-2.51189	446.292	16.8297	17.6384
Z-58	0	0.334214	1537.56	148.791	0.366213	23.121	2.63441	0.0522541	4.15886	0.311477	4.92303	0.0432507	2.63441	0.53512	272.951	7.04054	275.325	11.8726	295.542	102.689	0.86235	7.64397	0.945095	273.056	7.02468	7.79059
Z-59	0	0.0234622	50927.2	596.035	0.596493	5.28983	2.85185	0.104365	2.37218	2.71909	3.70948	0.189042	2.85185	0.768799	1116.18	29.2285	1333.69	27.5446	1702.33	63.8809	16.3083	34.432	21.8763	Discordant	Discordant	Discordant
Z-60	0	0.0453422	3610.9	403.946	1.39067	24.0506	3.23029	0.0511147	3.55642	0.292909	4.80447	0.041579	3.23029	0.672351	262.613	8.31268	260.846	11.0524	245.005	77.1069	-0.677214	-7.18668	-0.690303	262.43	8.2636	8.87146
Z-61	0	0.379008	4023.53	236.311	0.228888	13.937	3.67301	0.0532815	3.92326	0.526889	5.37429	0.0717514	3.67301	0.683441	446.699	15.8517	429.743	18.8327	339.841	73.0654	-3.94552	-31.4436	-3.69961	442.359	15.4515	16.297
Z-62	0	0.0516838	44262.3	336.063	0.526235	3.36318	2.95997	0.105022	2.66172	4.30371	3.98072	0.297337	2.95997	0.743576	1678.09	43.7323	1694.07	32.81	1713.89	49.5801	0.943276	2.08847	1.06165	1693.83	32.8036	35.917
Z-63	0	0.0728851	10830.8	571.565	0.786808	13.2177	2.46699	0.0567653	2.57959	0.59189	3.56936	0.0756563	2.46699	0.691157	470.143	11.1855	472.074	13.4764	481.487	58.195	0.408864	2.35598	0.412427	470.557	10.9874	12.3019
Z-64	0	0.172425	3943.39	364.07	0.362871	21.4383	2.96292	0.0551404	4.15524	0.35448	5.10342	0.0466455	2.96292	0.580575	293.894	8.51232	308.085	13.5624	416.928	147.118	4.60632	29.5096	5.2538	294.4	8.50208	9.26024
Z-65	0	0.0293951	7650.69	475.757	0.421142	14.2753	2.60761	0.0556243	2.92505	0.537021	3.91861	0.070051	2.60761	0.665441	436.463	11.0045	436.458	13.9028	436.414	65.116	-0.00098966	-0.0110903	-0.00402446	436.471	10.8506	12.0182
Z-66	0	0.179187	8059.03	449.488	0.715441	13.5102	2.60422	0.0560433	2.73388	0.571707	3.77572	0.0740179	2.60422	0.689729	460.317	11.5697	459.118	13.9463	453.141	59.8716	-0.261244	-1.58357	-0.263348	460.069	11.3576	12.5814
Z-67	0	0.105069	14250.5	762.54	0.42882	14.1229	2.44088	0.0568159	2.51	0.554446	3.50115	0.0708072	2.44088	0.697167	441.017	10.4047	447.905	12.6808	483.455	60.4501	1.53789	8.77804	1.5865	442.29	10.263	11.5294
Z-68	0	0.0107234	6567.03	90.0516	0.227853	4.94348	2.34876	0.0832463	3.0351	2.32083	3.83778	0.202287	2.34876	0.61201	1187.59	25.4751	1218.68	27.2402	1274.13	62.2937	2.55089	6.79197	2.90154	1199.75	23.7299	26.5435
Z-69	0	0.146319	18663.1	324.489	0.431236	5.66194	2.98643	0.0749783	2.72565	1.82508	4.04325	0.176618	2.98643	0.73862	1048.47	28.8981	1054.51	26.5284	1067.06	55.5072	0.572929	1.74223	0.517385	1052.43	25.6618	27.8119
Z-70	0	0.0154559	18806.5	194.364	0.352278	4.27032	2.83958	0.0951698	2.4755	3.0715	3.76713	0.234174	2.83958	0.753777	1356.34	34.7324	1425.61	28.8638	1530.6	50.734	4.85896	11.385	4.83983	1413.07	28.9152	31.7087
Z-71	0	0.154578	1231.26	130.886	0.480625	23.4975	2.47301	0.0496301	5.10636	0.291096	5.67368	0.0425578	2.47301	0.435874	268.668	6.50763	259.422	12.9896	176.669	89.9045	-3.56408	-52.0741	-3.81229	268.272	6.48868	7.25978
Z-72	0	0.151225	5488.4	570.101	0.567999	22.3134	2.32905	0.0505416	3.29897	0.312173	4.03827	0.0448161	2.32905	0.576743	282.616	6.44006	275.864	9.75535	218.952	63.0505	-2.44788	-29.0767	-2.53562	282.026	6.40401	7.2651
Z-73	0	0.603177	2499.19	260.29	0.213161	24.6488	3.03445	0.0499101	7.14174	0.279064	7.75966	0.0405699	3.03445	0.391054	256.364	7.62659	249.915	17.192	189.818	133.43	-2.58061	-35.0582	-2.79565	256.174	7.61306	8.23107
Z-75	0	0.891987	2143.62	216.969	0.518696	23.1882	3.70722	0.0461791	3.88005	0.274467	5.3664	0.0431254	3.70722	0.690821	272.176	9.88014	246.259	11.7353	5.91097	47.2642	-10.5243	-4504.6	-8.86288	265.443	9.63357	10.153
Z-76	0	0.0983396	10915.7	567.917	0.43184	12.6379	2.94064	0.0574055	2.54874	0.626026	3.89145	0.0791273	2.94064	0.755666	490.912	13.9	493.618	15.2138	506.184	57.6016	0.548152	3.01706	0.50802	491.763	13.5187	14.6917
Z-77	0	0.0491911	7524.1	425.292	0.418077	14.1034	3.35686	0.057981	2.9193	0.566597	4.44868	0.070905	3.35686	0.754573	441.605	14.3277	455.811	16.3386	528.11	76.794	3.11663	16.3801	3.12866	444.751	14.1148	15.0762
Z-78	0	0.262713	1114.84	104.365	0.737036	21.5729	2.85397	0.0510095	4.89671	0.325877	5.66771	0.0463543	2.85397	0.503549	292.1	8.1504	286.413	14.1454	240.26	96.8844	-1.98563	-21.5768	-2.13543	291.778	8.11965	8.85969
Z-79	0	0.218009	8485.58	501.927	0.381042	14.293	3.33196	0.0576575	3.56873	0.555962	4.8824	0.0699644	3.33196	0.682444	435.941	14.0452	448.895	17.7155	515.793	92.939	2.88562	15.4814	3.10735	437.851	13.9072	14.8592
Z-80	0	0.0726332	8383.03	759.19	0.248263	22.1435	1.92129	0.0517529	3.54258	0.322108	4.03004	0.04516	1.92129	0.476741	284.738	5.35157	283.523	9.96981	273.489	78.3272	-0.428714	-4.11306	-0.472977	284.694	5.3389	6.37567
Z-81	0	0.0863954	7731.9	441.926	0.622536	14.1352	2.60178	0.0576022	3.37621	0.561628	4.26241	0.0707453	2.60178	0.610403	440.644	11.0816	452.586	15.5665	513.686	86.4391	2.63843	14.2191	2.96891	441.899	11.0023	12.2032
Z-82	0	0.0139145	28789.6	745.864	0.324572	8.10002	2.42948	0.0687507	2.66953	1.16978	3.60954	0.123457	2.42948	0.673073	750.428	17.2104	786.541	19.7617	890.373	64.3052	4.59135	15.7176	5.12256	759.736	16.7287	18.7439
Z-83	0	0.0525608	31514.3	186.433	0.307387	2.97139	2.65951	0.116334	2.48159	5.39586	3.63748	0.336543	2.65951	0.731139	1870.02	43.1695	1884.2	31.1694	1899.84	45.0126	0.752542	1.56999	0.881366	1884.37	31.1523	34.8042
Z-84	0	0.0368156	4476.86	247.749	0.758523	13.1354	2.93506	0.0568431	3.07439	0.596413	4.25046	0.0761302	2.93506	0.690527	472.983	13.3853	474.955	16.1252	484.482	69.335	0.415184	2.37342	0.418582	473.409	13.1462	14.2747
Z-85	0	0.0245459	4532.41	246.473	0.468857	13.0845	3.11841	0.0569468	3.27913	0.599827	4.52517	0.0764266	3.11841	0.689126	474.758	14.2729	477.124	17.229	488.517	74.2032	0.495927	2.81657	0.50482	475.249	14.0206	15.0915
Z-86	0	0.0126021	167331	540.761	0.54213	2.21845	2.25839	0.161596	2.23395	10.039	3.17661	0.450765	2.25839	0.710943	2398.65	45.2345	2438.38	29.341	2471.67	38.2728	1.62927	2.95441	2.15019	2441.5	29.1365	33.9523
Z-87	0	0.886459	1156.94	113.663	0.470501	22.9308	2.29856	0.0464228	4.90411	0.279013	5.41606	0.0436095	2.29856	0.424398	275.168	6.19182	249.875	11.9973	18.6138	61.1181	-10.1223	-1378.3	-10.2726	273.516	6.15293	6.95189
Z-88	0	0.532684	775.192	36.197	0.0752597	12.1462	2.43811	0.0556462	5.73319	0.631402	6.23007	0.0823301	2.43811	0.391345	510.016	11.9556	496.969	24.4879	437.29	113.451	-2.62522	-16.6311	-3.09786	509.243	11.8828	13.2458
Z-89	0	0.0607037	33939	1737.36	1.10729	13.86	2.32397	0.0565739	2.21259	0.562556	3.2088	0.0721501	2.32397	0.724249	449.097	10.0816	453.188	11.7306	474.007	51.4088	0.902919	5.25532	0.890351	450.041	9.89921	11.2398
Z-90	0	0.547796	873.52	93.1927	1.5866	24.3751	2.30252	0.0487083	6.5731	0.275403	6.96471	0.0410254	2.30252	0.330598	259.186	5.84943	247.004	15.2717	132.813	105.233	-4.93181	-95.151	-5.30987	258.888	5.83907	6.6248
Z-91	0	0.612213	1254.71	115.726	0.47441	23.3433	2.3917	0.0538838	5.796	0.318132	6.27007	0.0428388	2.3917	0.381446	270.405	6.3335	280.465	15.3668	365.194	190.432	3.58679	25.9557	4.11971	270.526	6.33074	7.17594
Z-92	0	0.0455019	18150.8	401.686	1.04046	6.41049	2.13733	0.0693752	2.36994	1.49151	3.19136	0.155994	2.13733	0.669725	934.478	18.5927	926.931	19.4009	909.001	47.8183	-0.814202	-2.80267	-0.790469	931.132	17.3025	19.868
Z-93	0	0.151294	783.707	78.4851	0.551895	23.4	3.23485	0.0528142	6.06338	0.311062	6.87233	0.042735	3.23485	0.470707	269.763	8.54639	275.004	16.5575	319.857	165.697	1.90549	15.6612	2.13435	269.905	8.53611	9.16873
Z-94	0	0.0527513	1331.6	83.9031	0.34469	15.1285	2.44554	0.0551639	5.18189	0.502542	5.72997	0.0661005	2.44554	0.426797	412.619	9.7746	413.422	19.4617	417.88	117.056	0.194006	1.25886	0.222943	412.666	9.74097	10.9116
Z-95	0	0.215672	11677.5	605.336	0.501343	13.5691	2.44541	0.0556253	2.65363	0.564983	3.60857	0.0736971	2.44541	0.677668	458.391	10.8203	454.765	13.2286	436.455	56.7013	-0.797463	-5.0261	-0.798725	457.631	10.6233	11.9074
Z-96	0	0.176541	3131.45	217.323	0.517895	17.2271	2.87211	0.0565984	3.94498	0.452798	4.87974	0.0580481	2.87211	0.588579	363.744	10.1579	379.237	15.444	474.941	118.669	4.08526	23.4129	4.68666	364.665	10.1288	11.0688
Z-97	0	0.672327	1008.9	93.6876	0.499965	22.7451	3.20314	0.0507882	7.57507	0.307742	8.22446	0.0439654	3.20314	0.389465	277.366	8.69599	272.429	19.6542	230.201	150.994	-1.81215	-20.4888	-1.99019	277.219	8.68064	9.31548
Z-98	0	0.0256131	2457.45	256.377	0.381035	22.9565	2.73901	0.0533662	3.14481	0.320385	4.17037	0.0435606	2.73901	0.656779	274.866	7.37035	282.199	10.2752	343.403	91.7931	2.59854	19.9584	2.8039	275.379	7.34975	8.10476
Z-99	0	0.00333511	62950.8	585.798	1.91072	3.85884	2.16774	0.0974353	1.87841	3.47994	2.86837	0.259145	2.16774	0.755741	1485.47	28.7603	1522.68	22.6275	1574.77	36.5353	2.44376	5.67088	2.60653	1520.14	22.644	26.44
Z-100	0	0.0793469	8530.19	490.142	0.644614	13.9152	2.71764	0.0569574	2.66084	0.564121	3.80337	0.0718638	2.71764	0.714535	447.375	11.7457	454.205	13.9293	488.945	63.8143	1.50387	8.50196	1.52442	448.776	11.5627	12.728
Z-101	0	0.0251381	15718.3	398.796	0.435951	7.18278	2.41212	0.0684363	2.35279	1.31313	3.36956	0.139222	2.41212	0.715855	840.261	19.0027	851.5	19.4251	880.916	50.5421	1.31992	4.61505	1.25107	845.319	17.8289	20.011
Z-102	0	0.0207094	8472.18	174.962	0.410155	6.32885	3.42995	0.0712998	2.5615	1.55266	4.28087	0.158007	3.42995	0.801227	945.69	30.1696	951.552	26.445	965.14	53.1133	0.616033	2.0152	0.570064	950.475	26.2523	28.0633
Z-103	0	0.746194	1685.95	152.786	0.406079	23.3316	3.21714	0.0527665	5.64171	0.311691	6.49452	0.0428602	3.21714	0.495361	270.538	8.52346	275.491	15.6713	317.758	152.42	1.79806	14.8603	1.9978	270.71	8.51131	9.14836
Z-104	0	0.775161	1529.51	150.926	0.684847	23.7934	4.16592	0.0484312	5.16881	0.280531	6.63864	0.0420285	4.16592	0.627526	265.394	10.8316	251.079	14.7683	119.337	79.5826	-5.70161	-122.391	-5.48455	263.419	10.7183	11.1833
Z-105	0	0.240471	2979.98	330.227	0.30195	24.4844	2.83613	0.0505449	2.87911	0.284512	4.0414	0.0408424	2.83613	0.701769	258.052	7.17415	254.231	9.08942	219.146	58.3791	-1.50322	-17.7534	-1.47367	257.531	7.11794	7.7894
Z-106	0	0.0327267	19941.6	1027.09	0.57677	14.9067	2.04814	0.0555879	2.17665	0.513937	2.98876	0.0670838	2.04814	0.685281	418.563	8.30037	421.093	10.3024	434.954	50.1958	0.600941	3.76849	0.614541	419.014	8.19167	9.5919
Z-107	0	0.198126	11952.4	658.087	0.696888	13.8504	2.15992	0.0554201	2.45686	0.551466	3.2713	0.0722003	2.15992	0.660264	449.398	9.37604	445.956	11.8072	428.22	52.5993	-0.771707	-4.9455	-0.787088	448.753	9.22662	10.633
Z-108	0	0.907957	1748.5	176.531	0.357229	23.9685	3.362	0.0460394	3.31732	0.264729	4.72309	0.0417214	3.362	0.711821	263.494	8.68006	238.47	10.0386	0	39.877	-10.4934	19719.3	-8.63083	256.404	8.4478	9.00273
Z-109	0	0.040483	24424.1	907.771	0.851278	12.0779	2.4612	0.0645868	2.34778	0.736998	3.40141	0.0827962	2.4612	0.723583	512.791	12.1319	560.652	14.655	759.967	80.2749	8.53664	32.5246	10.1581	Discordant	Discordant	Discordant
Z-110	0	0.714226	928.393	106.663	0.286907	25.2823	2.47748	0.043455	6.58017	0.236884	7.03111	0.0395534	2.47748	0.35236	250.064	6.07667	215.866	13.6737	0	61.7631	-15.8423	275.451	-15.6362	248.216	6.03937	6.69414
Z-111	0	0.0745017	15246.8	764.632	0.414821	13.7844	2.07572	0.055924	1.97364	0.559144	2.86423	0.0725459	2.07572	0.724702	451.476	9.05073	450.969	10.4302	448.366	43.5871	-0.112332	-0.693593	-0.108829	451.352	8.86101	10.3372
Z-112	0	0.414813	1434.19	102.12	0.312881	16.8465	2.41074	0.0498031	4.54954	0.407437	5.14878	0.0593596	2.41074	0.468215	371.73	8.70795	347.028	15.1355	184.779	71.8002	-7.1183	-101.176	-7.49104	Discordant	Discordant	Discordant
Z-113	0	0.0328169	9054.44	560.55	0.193954	15.3496	2.72052	0.0556719	2.45411	0.499864	3.66386	0.0651484	2.72052	0.742527	406.86	10.7266	411.61	12.3991	438.315	58.5863	1.15409	7.17637	1.12512	407.928	10.5585	11.6299
Z-114	0	0.359908	3413.03	183.7	0.474608	13.9503	2.98586	0.0549651	4.14421	0.54302	5.10782	0.071683	2.98586	0.584567	446.287	12.8747	440.414	18.2539	409.809	86.4522	-1.3337	-8.90119	-1.43112	445.51	12.7274	13.7629
Z-115	0	0.126971	1819.21	176.095	0.406287	23.0207	3.04204	0.0526414	5.88927	0.315153	6.62853	0.0434392	3.04204	0.458931	274.115	8.16389	278.167	16.1298	312.376	153.496	1.45661	12.2482	1.62918	274.229	8.15316	8.83017
Z-116	0	0.209297	4347.18	241.019	0.503792	13.9215	3.38856	0.0560759	2.96809	0.555141	4.50465	0.0718315	3.38856	0.752236	447.18	14.6394	448.359	16.3291	454.389	66.8135	0.2629	1.58652	0.246345	447.511	14.303	15.249
Z-117	0	0.217608	2896.19	312.615	0.322119	24.9935	2.53376	0.0512801	3.63693	0.28277	4.43251	0.0400104	2.53376	0.571631	252.897	6.28375	252.853	9.92153	252.462	83.5082	-0.0175767	-0.172205	-0.0152257	252.885	6.26604	7.00139
Z-118	0	0.302462	4843.29	582.35	0.437259	27.696	2.17187	0.0490046	3.60578	0.243855	4.20935	0.0361063	2.17187	0.515963	228.653	4.879	221.573	8.37949	147.04	63.0265	-3.19537	-55.5035	-3.31588	228.252	4.863	5.61267
Z-119	0	0.0713287	15903.6	874.178	1.13621	15.2101	2.64194	0.0550735	2.30269	0.499025	3.5046	0.0657457	2.64194	0.753849	410.474	10.5064	411.042	11.8468	414.215	51.8823	0.138364	0.903343	0.130509	410.619	10.2984	11.4014
Z-120	0	0.236088	2410.37	234.362	0.484281	22.669	3.59064	0.0514148	3.74185	0.312585	5.18596	0.0441132	3.59064	0.692377	278.278	9.77936	276.183	12.5407	258.452	80.6596	-0.758599	-7.67083	-0.756631	278.001	9.70638	10.2868
Z-121	0	0.119196	25191.8	377.111	2.98927	5.98719	3.30555	0.0904721	4.1732	2.08259	5.32374	0.167023	3.30555	0.620906	995.689	30.4971	1143.09	36.5361	1434.66	111.623	12.8948	30.5978	19.1874	Discordant	Discordant	Discordant
Z-122	0	0.205524	2407.69	271.278	0.459897	26.3022	3.08287	0.0515282	4.03787	0.270001	5.08021	0.0380197	3.08287	0.60684	240.546	7.27908	242.695	10.967	263.508	101.65	0.885204	8.71403	0.941934	240.672	7.26121	7.85293
Z-123	0	0.120826	19903.5	195.648	0.355551	4.04926	3.00142	0.0915904	2.50065	3.11736	3.90663	0.246959	3.00142	0.768289	1422.77	38.3193	1436.98	30.0419	1458.06	48.3205	0.988794	2.42019	1.07319	1436.51	30.0358	32.8227
Z-124	0	0.0125022	75393.4	682.563	0.425122	3.79968	2.70583	0.0902784	2.06303	3.27453	3.40258	0.26318	2.70583	0.795227	1506.09	36.3417	1475.02	26.4727	1430.58	38.129	-2.10641	-5.27856	-2.7006	1470.9	26.4089	29.7415
Z-125	0	0.0722561	11916.3	247.109	1.11374	6.49156	2.77163	0.0704554	2.64472	1.49581	3.83099	0.154046	2.77163	0.723476	923.605	23.8496	928.684	23.3175	940.78	54.9683	0.546954	1.82564	0.500185	926.325	21.9022	23.9724
Z-126	0	0.0202673	11379	507.187	1.11957	12.3516	3.0026	0.0578283	3.28688	0.645254	4.45188	0.0809614	3.0026	0.674457	501.859	14.4972	505.554	17.7302	522.286	74.7002	0.730871	3.91114	0.755172	502.619	14.2388	15.4019
Z-127	0	1.3287	863.062	77.6878	0.484316	22.0349	2.53039	0.0430331	8.70362	0.269156	9.06398	0.0453826	2.53039	0.279169	286.111	7.0814	242.018	19.5205	0	81.2929	-18.2185	271.571	-18.3131	284.372	7.04581	7.75241
Z-128	0	0.0545716	2823.68	318.097	0.282818	23.9391	2.23438	0.049421	4.15864	0.284522	4.72089	0.0417727	2.23438	0.473298	263.812	5.77558	254.239	10.618	166.814	71.9938	-3.76532	-58.1468	-3.97375	263.304	5.75489	6.5839
Z-129	0	0.13421	1936.95	175.257	0.673712	22.2204	1.86904	0.0536868	3.70446	0.332987	4.14925	0.0450037	1.86904	0.450452	283.774	5.1888	291.844	10.5249	356.928	108.811	2.76519	20.4955	3.14657	283.958	5.18377	6.26755
Z-130	0	0.0516068	37972.5	224.358	0.55748	2.9137	2.69616	0.112625	2.10928	5.32722	3.4232	0.343206	2.69616	0.787612	1902.08	44.4095	1873.24	29.2732	1841.39	37.4909	-1.53932	-3.2957	-2.2584	1867.09	28.8254	32.8167
Z-131	0	0.026695	5963.83	372.341	0.722368	14.6389	2.94908	0.0539971	2.94797	0.508364	4.16985	0.0683112	2.94908	0.70724	425.973	12.1562	417.348	14.2708	369.928	59.4124	-2.0665	-15.1501	-1.95606	423.844	11.8941	12.9055
Z-132	0	0.0174105	20140.2	955.037	0.339361	14.4389	2.96842	0.0559471	2.33195	0.534019	3.77485	0.0692575	2.96842	0.786367	431.681	12.3944	434.473	13.3438	449.283	53.7138	0.642806	3.91798	0.57745	432.584	12.0833	13.1276
Z-133	0	1.17378	1104.38	109.485	0.388756	24.3926	1.97194	0.0445406	5.99996	0.251658	6.3157	0.0409961	1.97194	0.312228	259.004	5.00617	227.922	12.8944	0	62.5432	-13.6372	416.8	-13.8688	257.83	4.98587	5.82458
Z-134	0	0.0406223	7583.02	413.838	0.531265	13.1274	1.99938	0.0560984	2.71551	0.588956	3.37217	0.0761763	1.99938	0.592907	473.259	9.12327	470.201	12.6921	455.293	58.3287	-0.650491	-3.94616	-0.704367	472.834	9.01099	10.5762
Z-135	0	0.00966495	15954.7	840.084	0.395574	14.8313	3.17276	0.0575639	3.49348	0.534914	4.7192	0.0674251	3.17276	0.672309	420.624	12.9193	435.066	16.7008	512.224	94.3705	3.3194	17.8828	3.63733	422.441	12.818	13.7871
Z-136	0	0.0158133	12704.2	640.407	0.79421	13.2542	3.06196	0.0558536	2.83696	0.580777	4.1742	0.0754476	3.06196	0.733544	468.893	13.8476	464.96	15.5731	445.567	60.4338	-0.845672	-5.23502	-0.787887	467.751	13.4888	14.5625
Z-137	0	0.466393	15998.6	710.402	0.368954	14.4531	3.00888	0.0658325	4.53724	0.627757	5.44425	0.0691893	3.00888	0.552672	431.27	12.5519	494.698	21.3223	800.122	289.825	12.8216	46.0995	17.0737	Discordant	Discordant	Discordant
Z-138	0	0.0840041	9259.5	151.44	0.113591	5.8777	3.25149	0.0789828	2.76756	1.85198	4.26985	0.170134	3.25149	0.761501	1012.85	30.476	1064.14	28.1607	1170.86	61.5376	4.81936	13.4951	4.47654	1044.52	27.601	29.5853
Z-139	0	0.027864	6973.61	544.701	0.270092	19.3096	2.25955	0.0546406	3.11898	0.389991	3.85144	0.0517877	2.25955	0.586676	325.488	7.17196	334.363	10.9727	396.551	86.717	2.65435	17.9203	2.96288	326.025	7.15073	8.19422
Z-140	0	0.132443	9509.7	529.751	0.431936	13.9495	2.6178	0.0546089	2.71554	0.539531	3.77187	0.071687	2.6178	0.694032	446.312	11.2883	438.115	13.4227	395.247	55.2821	-1.87086	-12.9195	-1.80304	444.36	11.0468	12.2207
Z-141	0	0.0284128	50703.1	329.929	0.412013	3.09589	3.35151	0.111313	2.12434	4.95533	3.96806	0.323009	3.35151	0.844623	1804.41	52.7485	1811.73	33.5376	1820.16	38.7496	0.404509	0.865363	0.740911	1814.7	31.1212	34.6303
Z-142	0	0.506802	40064.9	948.589	0.379563	9.87787	8.88015	0.0769187	7.32084	1.0732	11.5088	0.101236	8.88015	0.771598	621.651	52.6253	740.309	60.5638	1118.23	340.331	16.0283	44.4078	23.8137	Discordant	Discordant	Discordant
Z-143	0	0.12302	14184.1	404.776	1.93676	8.2208	2.9953	0.0659152	2.43006	1.10505	3.85708	0.121643	2.9953	0.776573	740.011	20.9407	755.791	20.5621	802.751	54.5212	2.08787	7.81558	1.84057	748.259	19.6139	21.2682
Z-144	0	0.00314823	1484.7	89.1406	0.227489	15.0394	2.57454	0.0566161	4.8575	0.518827	5.4976	0.0664921	2.57454	0.468304	414.987	10.3474	424.367	19.0708	475.645	122.977	2.21048	12.7528	2.60233	415.426	10.3148	11.459
Z-145	0	0.0518662	4698.96	284.242	0.348374	14.3972	2.59256	0.0546654	3.15863	0.523294	4.08635	0.0694578	2.59256	0.634443	432.888	10.8544	427.349	14.2546	397.565	66.0244	-1.29612	-8.88494	-1.34103	431.986	10.704	11.856
Z-146	0	0.0210602	65660.2	774.448	0.380228	4.84687	2.27204	0.0870747	2.28602	2.47596	3.22305	0.206319	2.27204	0.704935	1209.18	25.0502	1265.04	23.3154	1361.29	48.0634	4.41562	11.1743	4.37161	1241.42	22.4796	25.5379
Z-147	0	0.0176896	12344.5	625.615	0.582785	13.1231	2.71207	0.0570534	2.5894	0.599179	3.74971	0.0762014	2.71207	0.723274	473.409	12.3791	476.712	14.2664	492.636	59.1605	0.69289	3.90278	0.676714	474.237	12.1229	13.3431
Z-148	0	0.000710389	20919.6	973.7	0.533821	12.962	2.12911	0.0553487	2.43822	0.588503	3.23698	0.0771488	2.12911	0.657746	479.082	9.83039	469.911	12.1773	425.343	49.5063	-1.95155	-12.6342	-1.955	477.135	9.6301	11.1214
Z-149	0	0.0013381	26344.2	1440.7	0.467593	15.2876	2.0895	0.0558024	2.24544	0.503066	3.06725	0.0654123	2.0895	0.68123	408.457	8.26995	413.776	10.4242	443.528	53.983	1.28545	7.90743	1.34362	409.285	8.17948	9.53318
Z-150	0	0.0778877	12041.7	658.804	0.481217	14.3615	2.73708	0.0562298	2.58632	0.539608	3.76572	0.0696306	2.73708	0.726841	433.93	11.4861	438.166	13.4021	460.467	60.5635	0.966891	5.7632	0.952592	434.884	11.2919	12.4164
ZZ9						Isotopic Ratios + measurement Uncertainty (2s)									Ages uncorrected for common lead + measurement Uncertainty (2s)
						Data for Tera-Wasserburg plot				Data for Wetherill plot
Sample	Is rejected?	% common lead (f206c)	206Pb (mV)	U (ppm)	U/Th	238U/206Pb	238U/206Pb Uncertainty ( % 2s)	207Pb/206Pb	207Pb/206Pb Uncertainty (% 2s)	207Pb/235U	207Pb/235U Uncertainty (% 2s)	206Pb/238U	206Pb/238U Uncertainty (% 2s)	r	Age 206Pb/238U	Age 206Pb/238U measurement Uncertainty (2s)	Age 207Pb/235U	Age 207Pb/235U measurement Uncertainty (2s)	Age 207Pb/206Pb	Age 207Pb/206Pb measurement Uncertainty (2s)	Discordance 206Pb/238U vs 207Pb/235U (%)	Discordance 206Pb/238U vs 207Pb/206Pb (%)	Distance to Concordia	Best age (Concordia)	Best age measurement Uncertainty (2S)	Best age Systematic Uncertainty (2S)
Z-1	0	0.0246903	4947.44	410.154	0.48347	24.8127	2.53443	0.0526877	2.65072	0.29265	3.66738	0.040302	2.53443	0.691074	254.705	6.32944	260.643	8.43068	314.375	76.6111	2.27827	18.9806	2.40404	255.185	6.31031	7.064
Z-2	0	2.58988	5169.19	83.4163	0.291216	13.5815	3.3278	0.118845	15.2882	1.206	15.6462	0.0736298	3.3278	0.212691	457.987	14.7121	803.352	87.065	1938.14	332.019	42.9905	76.3698	76.2579	Discordant	Discordant	Discordant
Z-3	0	0.0188963	11128.5	493.02	1.49758	14.2673	2.47825	0.0568478	2.13621	0.549142	3.27187	0.0700904	2.47825	0.757441	436.7	10.4641	444.434	11.7771	484.687	52.1061	1.74015	9.90052	1.67864	438.656	10.272	11.5181
Z-4	0	0.139343	13440.9	198.102	0.332737	6.29459	3.6402	0.0724263	3.19084	1.58577	4.84072	0.158867	3.6402	0.751996	950.475	32.1693	964.639	30.1521	997.042	67.2693	1.46832	4.67054	1.31571	959.215	29.1036	30.7739
Z-5	0	0.314254	37013.4	1114.42	0.634259	13.412	2.7603	0.0635861	5.89483	0.653402	6.50909	0.0745601	2.7603	0.424068	463.57	12.3467	510.57	26.1245	726.99	229.842	9.20542	36.2343	11.9607	Discordant	Discordant	Discordant
Z-6	0	0.145598	7505	323.624	0.498959	14.3128	2.32359	0.0561072	3.01992	0.540265	3.81038	0.0698676	2.32359	0.609805	435.358	9.78191	438.599	13.5717	455.624	69.8436	0.73895	4.44794	0.805424	435.758	9.6902	10.985
Z-7	0	0.123978	18084.9	380.756	1.91584	9.82077	3.47709	0.0811038	2.90516	1.13817	4.53101	0.101825	3.47709	0.767398	625.096	20.7146	771.642	24.4949	1223.09	169.316	18.9915	48.892	31.723	Discordant	Discordant	Discordant
Z-8	0	0.858481	11477.6	376.682	0.665525	14.7494	2.77924	0.0715644	4.77277	0.668707	5.523	0.0677995	2.77924	0.503212	422.885	11.3758	519.926	22.4767	972.708	3287.31	18.6644	56.525	26.6163	Discordant	Discordant	Discordant
Z-9	0	0.39685	16275	590.052	0.381923	14.7886	2.27702	0.0628454	3.45483	0.585678	4.13771	0.0676197	2.27702	0.550309	421.799	9.29698	468.104	15.5191	702.097	159.044	9.89196	39.9229	12.6116	Discordant	Discordant	Discordant
Z-10	0	2.10821	533.361	23.344	0.606202	14.6567	3.19136	0.0378863	7.50465	0.356253	8.15503	0.0682282	3.19136	0.391336	425.472	13.1399	309.413	21.754	0	56.827	-37.5094	186.072	-31.9062	Discordant	Discordant	Discordant
Z-11	0	0.844333	3588.95	246.229	0.444589	23.4515	2.93044	0.0513787	4.63905	0.301943	5.4871	0.0426412	2.93044	0.53406	269.184	7.72585	267.917	12.922	256.876	102.279	-0.472863	-4.79124	-0.511673	269.123	7.70349	8.38286
Z-12	0	0.00460559	13126.7	571.806	0.615315	14.2204	2.07785	0.0563815	2.52889	0.546433	3.27303	0.0703215	2.07785	0.634839	438.092	8.80046	442.657	11.7437	466.481	59.3446	1.03126	6.08568	1.10993	438.725	8.70921	10.1488
Z-13	0	0.0861091	3514.43	307.823	0.509572	25.2012	2.91169	0.0502054	3.0583	0.274563	4.22269	0.0396807	2.91169	0.689534	250.853	7.16378	246.335	9.2366	203.483	60.2721	-1.83405	-23.2797	-1.7992	250.263	7.11077	7.74774
Z-14	0	0.0093372	9064.57	402.523	0.65588	13.9351	2.05038	0.0573111	2.67243	0.566813	3.36837	0.071761	2.05038	0.608715	446.757	8.84999	455.952	12.3736	502.573	65.8911	2.01663	11.1061	2.25131	447.787	8.77813	10.2689
Z-15	0	0.0124216	86063.8	537.593	0.696043	3.70073	3.24131	0.0982797	2.30996	3.66006	3.9802	0.270217	3.24131	0.814359	1541.9	44.4502	1562.7	31.7522	1590.91	44.0216	1.33107	3.0802	1.89649	1567.01	31.1438	34.0969
Z-16	0	0.107508	11919.5	510.802	0.412838	14.7213	2.80766	0.0555154	2.46353	0.519733	3.73523	0.0679289	2.80766	0.751669	423.666	11.5126	424.973	12.9713	432.05	55.8586	0.307602	1.94043	0.291076	424.005	11.2781	12.3521
Z-17	0	0.251363	2517.96	101.579	0.440487	14.2262	2.11238	0.0574583	4.57664	0.556642	5.04061	0.0702928	2.11238	0.419072	437.92	8.94332	449.339	18.3041	508.212	116.698	2.54133	13.8314	3.05612	438.357	8.92038	10.3502
Z-18	0	0.68353	10563.3	353.544	0.578056	14.2294	3.39493	0.0659067	9.51542	0.638345	10.1029	0.0702771	3.39493	0.336035	437.825	14.3703	501.281	39.99	802.481	575.883	12.6588	45.4411	16.8857	Discordant	Discordant	Discordant
Z-19	0	0.0350649	18264.2	711.94	0.334407	14.4833	2.5563	0.0563875	2.3213	0.53657	3.45298	0.0690449	2.5563	0.740316	430.399	10.643	436.161	12.2439	466.695	55.4699	1.32103	7.77737	1.29401	431.733	10.4615	11.6532
Z-20	0	0.420529	2945.76	246.41	3.14298	26.0593	2.66481	0.0496639	3.601	0.262658	4.47978	0.038374	2.66481	0.594853	242.746	6.34845	236.807	9.46246	178.256	67.0722	-2.50833	-36.1784	-2.56362	242.259	6.31792	6.98287
Z-22	0	0.301367	1346.66	102.41	0.341787	25.1584	2.58522	0.0533563	5.13186	0.29229	5.74625	0.0397482	2.58522	0.449897	251.272	6.37095	260.361	13.1975	342.97	173.081	3.49089	26.7365	3.94639	251.436	6.36752	7.10457
Z-23	0	0.0419598	33181.2	415.225	0.780816	5.43908	2.52366	0.0763694	2.24313	1.93511	3.37647	0.183855	2.52366	0.747427	1088	25.2654	1093.31	22.6071	1103.88	45.3221	0.485768	1.43888	0.441028	1091.79	22.088	24.6806
Z-24	0	0.132602	3078.11	254.609	0.429332	24.5984	2.50813	0.0510387	3.5935	0.28596	4.38223	0.0406531	2.50813	0.572341	256.88	6.3162	255.374	9.89502	241.595	78.4669	-0.589461	-6.32669	-0.628528	256.795	6.29537	7.04489
Z-25	0	0.00283125	15731.1	735.555	1.14481	18.0055	2.53587	0.0540003	2.39131	0.413335	3.48554	0.0555385	2.53587	0.72754	348.435	8.60133	351.274	10.3508	370.058	57.0251	0.808046	5.84306	0.803981	348.933	8.50807	9.4996
Z-26	0	0.0342028	4093.76	297.726	0.530742	24.1874	3.00861	0.0580286	5.56867	0.330648	6.32944	0.0413439	3.00861	0.475336	261.158	7.7002	290.06	15.971	529.907	989.957	9.9643	50.7163	12.0408	261.027	7.70013	8.40106
Z-27	0	0.139796	12715.6	521.313	0.582408	14.3258	2.55092	0.0554639	2.65207	0.533586	3.67977	0.0698042	2.55092	0.693229	434.976	10.7298	434.187	13.0008	429.978	58.5206	-0.181881	-1.1625	-0.181878	434.815	10.5528	11.7412
Z-28	0	0.0408483	8728.18	389.504	0.977874	14.4862	2.42985	0.0546599	2.71834	0.520028	3.64604	0.0690313	2.42985	0.666437	430.317	10.1147	425.17	12.6663	397.34	57.0574	-1.21048	-8.29943	-1.21878	429.341	9.95304	11.1714
Z-29	0	0.105193	12534.4	527.727	0.562712	14.5846	2.10702	0.0561461	2.22553	0.530565	3.06472	0.0685656	2.10702	0.687508	427.508	8.71549	432.184	10.7876	457.195	52.5447	1.08202	6.49328	1.11704	428.329	8.60291	9.99981
Z-30	0	0.0381846	21553.6	789.375	0.882712	14.2794	2.06329	0.0553995	2.4793	0.534696	3.22554	0.0700307	2.06329	0.639674	436.341	8.70506	434.921	11.4113	427.391	54.3063	-0.326366	-2.09412	-0.343941	436.126	8.594	10.0231
Z-31	0	1.27126	1178.27	98.7716	0.283362	25.7465	2.54209	0.040752	5.81425	0.218144	6.34569	0.0388402	2.54209	0.400602	245.64	6.12692	200.364	11.5391	0	43.0512	-22.597	180.755	-20.7562	241.293	6.04774	6.64816
Z-32	0	1.58203	1948.98	159.027	0.126832	25.7305	3.4313	0.04049	4.99834	0.216876	6.06277	0.0388644	3.4313	0.565962	245.79	8.27502	199.307	10.9719	0	36.2352	-23.3225	176.64	-18.8953	235.106	8.01662	8.47958
Z-33	0	0.0580323	17944.4	657.875	0.787922	14.2218	2.23667	0.0555927	2.70469	0.538736	3.5097	0.0703146	2.23667	0.637282	438.051	9.47227	437.591	12.4777	435.149	59.8817	-0.105157	-0.666809	-0.11291	437.989	9.35547	10.6946
Z-34	0	0.181705	11988.3	491.902	0.874304	14.2931	2.6515	0.0557752	2.54891	0.537809	3.67796	0.069964	2.6515	0.720915	435.939	11.1767	436.979	13.0613	442.443	57.4384	0.238094	1.47004	0.234079	436.172	10.9727	12.1286
Z-35	0	0.0188772	7100.81	283.69	0.548819	13.9485	3.26525	0.0570318	3.82239	0.56351	5.02718	0.0716922	3.26525	0.64952	446.343	14.0811	453.808	18.3994	491.806	92.3968	1.64515	9.2441	1.7734	447.419	13.9312	14.9103
Z-36	0	0.0628709	21382.6	773.698	0.661776	14.2507	2.33566	0.055467	2.47462	0.536426	3.4028	0.0701718	2.33566	0.686393	437.191	9.87271	436.065	12.0638	430.105	54.3808	-0.258085	-1.64752	-0.261922	436.977	9.71247	11.0022
Z-37	0	0.490615	12007.6	381.44	0.467546	13.7069	5.17623	0.0641312	14.5843	0.644828	15.4756	0.0729562	5.17623	0.334476	453.941	22.6888	505.291	61.6787	745.02	631.963	10.1624	39.0699	13.3532	Discordant	Discordant	Discordant
Z-38	0	0.0250488	29054.1	1168.3	0.94315	14.1271	2.54142	0.0550389	2.58313	0.536946	3.62373	0.0707862	2.54142	0.701328	440.89	10.8303	436.409	12.8553	412.808	54.6737	-1.02697	-6.80284	-0.99792	439.852	10.617	11.8175
Z-39	0	0.0332715	12904.2	546.313	0.443877	14.046	2.39648	0.0550704	2.41758	0.540352	3.40408	0.0711944	2.39648	0.704001	443.348	10.2676	438.657	12.1257	414.089	51.0611	-1.06945	-7.06593	-1.03648	442.244	10.0592	11.3304
Z-40	0	0.0181113	22268.9	820.622	0.535786	14.777	2.63749	0.0564629	2.37467	0.526611	3.54901	0.0676728	2.63749	0.743165	422.12	10.7767	429.558	12.4314	469.635	58.2543	1.73161	10.1174	1.70862	423.775	10.6085	11.7509
Z-41	0	0.132786	10372.8	399.596	1.05371	13.373	2.7447	0.057653	3.14313	0.594162	4.17285	0.0747775	2.7447	0.657753	464.875	12.3102	473.522	15.7932	515.622	76.1405	1.82621	9.84192	1.9666	466.21	12.1642	13.3564
Z-42	0	0.477222	1307.87	51.7672	0.36422	14.5911	2.05489	0.0575689	5.27626	0.543767	5.66229	0.068535	2.05489	0.362908	427.323	8.49631	440.905	20.254	512.449	139.779	3.08042	16.6115	3.74902	427.662	8.48308	9.92312
Z-43	0	0.271429	4108.18	181.894	0.286224	15.2623	3.59915	0.0555924	4.341	0.502006	5.63898	0.0655211	3.59915	0.638263	409.115	14.2672	413.059	19.139	435.135	102.376	0.954874	5.97982	1.02216	409.63	14.1359	14.9599
Z-44	0	0.00185866	14755.2	591.857	0.563832	14.3842	2.45393	0.0551193	2.37999	0.528118	3.41849	0.0695208	2.45393	0.717839	433.268	10.2827	430.56	11.9966	416.072	51.3774	-0.629037	-4.13297	-0.603353	432.607	10.0787	11.304
Z-45	0	0.37478	2597.74	111.044	0.430842	14.6404	2.65887	0.0538925	3.86053	0.507326	4.68757	0.0683041	2.65887	0.567217	425.93	10.9589	416.649	16.0211	365.556	77.2236	-2.22747	-16.5158	-2.38481	424.81	10.8415	11.9394
Z-46	0	0.443335	14592.5	520.517	0.408629	14.9294	2.72953	0.0647722	6.38371	0.59794	6.94277	0.0669818	2.72953	0.393147	417.946	11.046	475.926	26.385	766.01	396.77	12.1825	45.4385	16.0385	Discordant	Discordant	Discordant
Z-47	0	0.202659	11150.7	483.839	1.07964	14.213	2.45872	0.0548073	2.69193	0.531454	3.6458	0.0703583	2.45872	0.6744	438.314	10.4187	432.774	12.8472	403.372	56.306	-1.28008	-8.66253	-1.27466	437.184	10.2374	11.4625
Z-48	0	0.179012	15662.2	323.49	0.829494	10.237	3.66194	0.0826083	4.05225	1.11215	5.46173	0.0976853	3.66194	0.670471	600.829	21.0078	759.211	29.2092	1259.11	318.415	20.8613	52.2814	34.6945	Discordant	Discordant	Discordant
Z-49	0	0.392603	7215.06	273.534	0.425896	13.5558	2.88392	0.056983	2.97372	0.579338	4.14246	0.0737691	2.88392	0.696185	458.823	12.7722	464.036	15.4305	489.923	69.6647	1.12333	6.3478	1.14879	459.862	12.5716	13.6951
Z-50	0	1.13104	1815.82	153.356	0.150304	26.0973	3.18774	0.0428469	4.91897	0.226275	5.86157	0.0383182	3.18774	0.543838	242.4	7.58361	207.119	10.9827	0	43.381	-17.0341	236.514	-15.0625	236.716	7.44306	7.95105
Z-51	0	0.0818112	4813.23	409.412	0.541888	25.9709	2.59166	0.0528526	3.32885	0.280473	4.21877	0.0385047	2.59166	0.614318	243.557	6.19443	251.033	9.38316	321.507	106.548	2.97794	24.2449	3.25484	243.892	6.18568	6.89788
Z-52	0	0.764518	178442	1071.4	0.57202	6.04839	4.54003	0.13856	2.56617	3.15725	5.21508	0.165333	4.54003	0.870558	986.347	41.5228	1446.77	40.2366	2208.51	126.161	31.8244	55.3389	160.689	Discordant	Discordant	Discordant
Z-53	0	0.0221966	18459.7	675.811	1.03311	14.7285	2.23105	0.0583521	2.46757	0.546024	3.32663	0.0678958	2.23105	0.670662	423.466	9.1441	442.389	11.9303	542.057	70.7697	4.27734	21.8779	4.77867	425.615	9.08432	10.4339
Z-54	0	0.0564512	11737.5	502.761	1.54876	14.4472	1.75987	0.057168	2.74366	0.545358	3.25957	0.0692176	1.75987	0.539909	431.44	7.3443	441.951	11.6805	497.062	69.5466	2.37837	13.2019	2.75359	432.193	7.30817	8.95424
Z-55	0	0.317958	4241.45	327.554	0.373332	23.6606	5.27364	0.0511367	3.03226	0.297865	6.08325	0.0422643	5.27364	0.866912	266.853	13.7856	264.731	14.177	245.996	65.0999	-0.801562	-8.47876	-0.633288	265.995	13.481	13.8732
Z-56	0	0.115478	948.706	38.4383	0.508905	12.488	5.67407	0.050829	7.12336	0.560957	9.10699	0.0800766	5.67407	0.623045	496.58	27.1184	452.149	33.2429	232.057	109.894	-9.82653	-113.991	-8.94004	Discordant	Discordant	Discordant
Z-57	0	0.0414713	1852.66	149.977	0.181006	26.9455	3.93411	0.0553794	4.89306	0.283253	6.27847	0.0371119	3.93411	0.626602	234.906	9.07512	253.235	14.0726	426.581	385.941	7.23762	44.9328	8.3895	235.037	9.07458	9.55841
Z-58	0	0.139589	14587.4	597.076	0.406666	15.0142	2.35504	0.0569019	2.27923	0.522321	3.27736	0.0666037	2.35504	0.718578	415.661	9.48006	426.701	11.4184	486.771	59.0163	2.58714	14.6085	2.68137	417.588	9.37292	10.6253
Z-59	0	0.0178381	25455.9	500.008	0.480982	7.8979	2.28196	0.0711307	2.37971	1.24125	3.29702	0.126616	2.28196	0.692127	768.532	16.5325	819.447	18.5425	960.302	59.7899	6.21336	19.9698	7.02449	781.885	16.0814	18.2843
Z-60	0	0.116653	5108.28	326.103	0.515777	20.6012	2.06193	0.0553507	2.67819	0.370291	3.37998	0.0485409	2.06193	0.610042	305.557	6.15338	319.869	9.2744	425.423	91.1967	4.47422	28.1756	5.07151	306.222	6.14306	7.22522
Z-61	0	0.126785	7451.39	547.355	0.352648	24.938	2.93401	0.0528576	2.43789	0.292118	3.81467	0.0400995	2.93401	0.769138	253.45	7.29194	260.225	8.75697	321.724	73.2802	2.60378	21.2213	2.65243	254.242	7.2606	7.92008
Z-62	0	0.0137961	3562.36	300.441	0.187204	27.307	2.48602	0.0564329	4.06054	0.28482	4.76112	0.0366206	2.48602	0.52215	231.852	5.66146	254.474	10.7172	468.461	787.365	8.88974	50.5077	10.5074	231.771	5.66141	6.40044
Z-63	0	0.88339	1356.16	59.4308	0.254875	15.3277	2.50168	0.050184	4.07336	0.451233	4.78023	0.0652415	2.50168	0.523339	407.423	9.87701	378.143	15.093	202.538	64.1854	-7.74317	-101.159	-7.90404	Discordant	Discordant	Discordant
Z-64	0	0.00468464	4827.65	210.33	38.0424	15.1941	2.65486	0.060053	3.16219	0.544719	4.12889	0.0658152	2.65486	0.642996	410.894	10.5683	441.531	14.7848	604.522	112.627	6.93892	32.03	8.26148	412.781	10.5412	11.6926
Z-65	0	0.161233	8902.09	287.737	0.437858	11.7805	3.04026	0.062036	2.77452	0.725758	4.11597	0.084886	3.04026	0.738652	525.221	15.3349	554.061	17.5775	674.44	77.2228	5.20515	22.1249	5.55486	531.254	15.1073	16.348
Z-66	0	0.303322	6729.33	290.347	0.375756	15.068	4.11066	0.0566538	2.9785	0.518186	5.07632	0.0663658	4.11066	0.809772	414.224	16.4918	423.939	17.5948	477.1	75.8081	2.29173	13.1788	2.07575	417.289	16.1438	16.8941
Z-67	0	0.684937	21211.7	657.295	0.311402	16.1048	2.60802	0.0709848	2.81622	0.607465	3.83835	0.0620932	2.60802	0.679465	388.343	9.82904	481.96	14.7294	956.066	595.815	19.4243	59.3812	29.1968	Discordant	Discordant	Discordant
Z-68	0	0.00519899	4401.24	183.349	1.18655	14.5768	3.12201	0.0598086	3.98189	0.565474	5.05988	0.068602	3.12201	0.617013	427.728	12.9203	455.083	18.5603	595.71	128.383	6.01106	28.1986	7.12419	429.594	12.877	13.8967
Z-69	0	0.00719922	48618.4	263.887	0.231155	3.57885	3.65957	0.113756	2.28006	4.38071	4.31175	0.27942	3.65957	0.848745	1588.44	51.522	1708.71	35.6588	1859.47	45.6583	7.03858	14.5755	12.5361	Discordant	Discordant	Discordant
Z-70	0	0.0284503	22256.7	788.906	0.618863	14.759	1.8128	0.0580301	2.48463	0.541887	3.07565	0.0677553	1.8128	0.589404	422.618	7.41549	439.668	10.9759	529.966	69.4598	3.87795	20.2557	4.48475	423.936	7.38163	8.98055
Z-71	0	0.185789	23469.3	628.711	1.96019	12.7569	2.85016	0.0732345	2.79518	0.791193	3.99205	0.0783889	2.85016	0.713959	486.499	13.3557	591.848	17.9065	1019.55	292.406	17.8001	52.2829	27.0764	Discordant	Discordant	Discordant
Z-72	0	0.0914409	85873.4	689.444	3.04328	4.74533	3.08871	0.0881833	2.13621	2.56113	3.75547	0.210734	3.08871	0.822456	1232.72	34.6561	1289.62	27.4311	1385.63	44.6768	4.41153	11.0348	5.30746	1293.31	27.295	29.8494
Z-73	0	0.0333652	8595.62	386.372	0.664552	14.7209	2.55797	0.0573459	2.891	0.536883	3.86019	0.0679305	2.55797	0.662654	423.675	10.489	436.367	13.6932	503.882	75.9685	2.90853	15.9178	3.17884	425.293	10.4032	11.5865
Z-74	0	0.0335896	46427.9	300.863	0.136412	3.8085	2.16106	0.0986977	2.16811	3.57162	3.06119	0.262571	2.16106	0.705955	1502.98	28.9719	1543.25	24.2884	1598.83	42.1255	2.60929	5.99511	2.57182	1533.85	24.0177	27.7065
Z-75	0	0.196652	3715.96	200.935	0.348453	18.3197	2.80437	0.0553075	3.69922	0.416082	4.64206	0.0545862	2.80437	0.604121	342.617	9.35737	353.246	13.8503	423.684	104.238	3.00893	19.134	3.36555	343.344	9.32544	10.2288
Z-76	0	0.924914	1234.18	54.3914	0.260945	15.5191	2.68861	0.0500408	5.78564	0.444395	6.37983	0.0644367	2.68861	0.421424	402.551	10.492	373.347	19.9333	195.898	90.611	-7.82227	-105.491	-8.40611	Discordant	Discordant	Discordant
Z-77	0	0.00594335	138527	790.277	1.36485	4.02823	2.23419	0.0979791	2.5052	3.35221	3.35673	0.248248	2.23419	0.665586	1429.43	28.6433	1493.31	26.2581	1585.18	50.2405	4.27732	9.82521	4.45517	1466.87	25.2211	28.637
Z-78	0	2.02857	1198.41	93.4497	0.274602	27.3324	2.62865	0.0397557	5.07021	0.200462	5.71111	0.0365865	2.62865	0.460269	231.64	5.9809	185.517	9.68384	0	33.7396	-24.8617	162.961	-21.5826	225.17	5.86414	6.41174
Z-79	0	0.00879094	2916.17	224.571	0.401938	24.5726	2.61154	0.0556374	3.50378	0.312053	4.36997	0.0406958	2.61154	0.597612	257.144	6.58326	275.771	10.5536	436.939	201.387	6.75449	41.1487	7.83197	257.416	6.58183	7.34739
Z-80	0	0.0169089	22912.8	860.201	0.264473	15.5483	2.19065	0.0583258	2.19407	0.516998	3.10046	0.0643156	2.19065	0.706555	401.818	8.53368	423.144	10.7294	541.062	67.9792	5.04007	25.7354	5.59047	404.271	8.48432	9.80275
Z-81	0	0.118343	23122.3	182.492	0.804798	5.29293	3.44116	0.113145	3.30154	2.94614	4.76883	0.188931	3.44116	0.721593	1115.58	35.2509	1393.85	36.1665	1849.74	96.2693	19.9642	39.6897	36.6796	Discordant	Discordant	Discordant
Z-82	0	0.0630628	12675.7	510.359	0.475238	15.3113	2.81537	0.0580333	2.55266	0.522369	3.80032	0.0653113	2.81537	0.740825	407.846	11.1267	426.733	13.2413	530.085	75.0913	4.42599	23.0603	4.70215	410.803	11.0314	12.0957
Z-83	0	0.189318	4076.86	327.087	0.266999	25.9367	3.07118	0.0530329	3.20638	0.281801	4.43993	0.0385554	3.07118	0.691718	243.873	7.34987	252.085	9.91157	329.237	106.458	3.25794	25.9279	3.50784	244.375	7.33558	7.94811
Z-84	0	0.22578	1749.42	124.967	0.569273	26.6523	2.56046	0.0596673	4.37227	0.308542	5.06683	0.0375202	2.56046	0.505339	237.444	5.96905	273.05	12.1315	590.595	387.897	13.0402	59.7959	16.1353	236.739	5.96598	6.72659
Z-85	0	0.242858	993.653	84.0038	0.268435	28.0973	2.18598	0.0527566	6.53031	0.258776	6.88646	0.0355906	2.18598	0.317431	225.444	4.84296	233.68	14.3758	317.331	235.762	3.52481	28.9562	3.98539	225.492	4.84217	5.61526
Z-86	0	0.0119014	20565	759.259	0.549705	15.0355	2.38747	0.0577467	2.53903	0.529324	3.48521	0.0665092	2.38747	0.685029	415.09	9.59783	431.361	12.249	519.19	70.9328	3.77189	20.0504	4.12972	417.151	9.52641	10.7717
Z-87	0	0.303097	20170.5	636.546	0.566018	14.7546	3.96117	0.0654562	5.04674	0.611413	6.41564	0.0677753	3.96117	0.617424	422.738	16.2081	484.451	24.722	788.101	332.652	12.7386	46.3599	16.8968	Discordant	Discordant	Discordant
Z-88	0	0.129129	12552.7	532.413	0.601317	14.5635	1.94778	0.0568178	2.53929	0.53769	3.20029	0.0686649	1.94778	0.608625	428.107	8.06771	436.9	11.3632	483.531	63.1314	2.01261	11.4622	2.24074	429.042	8.00836	9.50939
Z-89	0	0.0126897	107578	568.496	1.09192	3.42835	3.04075	0.102354	2.3183	4.11465	3.8237	0.291686	3.04075	0.795238	1649.95	44.2647	1657.22	31.2441	1666.42	43.1506	0.43867	0.988819	0.600877	1658.44	30.862	34.0817
Z-90	0	0.0977637	7578.44	315.169	0.453258	14.6112	2.37199	0.0593116	3.19915	0.559455	3.98258	0.0684406	2.37199	0.595592	426.754	9.79479	451.172	14.5083	577.607	98.8737	5.4121	26.1169	6.4003	428.375	9.761	11.0594
Z-91	0	0.0212462	12101.7	519.407	0.617726	15.0669	2.74991	0.0576443	2.61816	0.527282	3.79694	0.0663705	2.74991	0.724244	414.252	11.0332	430.005	13.3111	515.291	72.6707	3.66343	19.6082	3.87636	416.76	10.9287	12.0242
Z-92	0	0.0834774	4097.54	330.4	0.351813	24.996	2.43551	0.0519402	3.16223	0.286381	3.99142	0.0400064	2.43551	0.610186	252.872	6.0395	255.707	9.02284	281.802	80.8313	1.10854	10.266	1.18467	253.046	6.02353	6.79193
Z-93	0	0.0262536	13642	548.266	0.95878	14.7093	2.49405	0.0563995	2.81879	0.528441	3.76376	0.0679843	2.49405	0.662648	424.001	10.2345	430.774	13.2137	467.171	68.4725	1.57244	9.24083	1.67879	424.971	10.1293	11.3282
Z-94	0	0.155323	5682.07	421.741	0.213919	26.5446	4.26147	0.0537217	3.458	0.278924	5.48798	0.0376724	4.26147	0.776511	238.389	9.97336	249.804	12.1536	358.398	142.343	4.56926	33.4848	4.88274	239.223	9.95625	10.4014
Z-95	0	0.0161786	56036.6	127.177	0.547276	2.31617	2.39294	0.167116	2.39624	9.944	3.38646	0.431747	2.39294	0.706619	2313.59	46.5171	2429.6	31.2534	2528.22	42.0784	4.77486	8.48954	6.05566	2433.52	31.1039	35.5367
Z-96	0	0.136066	17043.9	349.57	0.491236	8.99573	2.70441	0.0697779	2.93135	1.06904	3.98832	0.111164	2.70441	0.678083	679.504	17.4412	738.269	20.9269	920.949	82.4517	7.9599	26.217	9.65546	689.402	17.2048	18.9482
Z-97	0	0.467415	11766.8	396.864	1.13985	14.8971	5.13307	0.0671402	12.3113	0.621143	13.3386	0.0671269	5.13307	0.384829	418.823	20.815	490.564	51.9384	841.239	1179.56	14.6241	50.2135	19.7115	Discordant	Discordant	Discordant
Z-98	0	0.050845	16944.5	629.654	0.458663	14.7827	2.18872	0.0580758	2.6444	0.541443	3.43269	0.0676466	2.18872	0.637612	421.961	8.93978	439.376	12.2436	531.688	74.3816	3.96342	20.6375	4.49013	423.66	8.88821	10.2519
Z-99	0	0.0721824	12883.3	521.832	0.428441	14.6855	1.9826	0.056637	2.94866	0.531526	3.55321	0.0680945	1.9826	0.557976	424.666	8.14811	432.822	12.522	476.442	72.8888	1.88443	10.8674	2.14457	425.339	8.10191	9.56702
Z-100	0	0.491398	4120.96	181.929	0.464843	14.9511	3.38083	0.0518801	2.94147	0.478232	4.48132	0.0668845	3.38083	0.754427	417.359	13.6631	396.859	14.7219	279.155	51.6215	-5.16535	-49.5077	-4.29896	409.653	13.158	14.0252
Z-101	0	0.12346	6192.92	271.579	0.663013	15.0146	2.73922	0.05538	2.29465	0.508337	3.57334	0.0666019	2.73922	0.766572	415.651	11.0263	417.33	12.2286	426.603	52.3878	0.402445	2.56744	0.373533	416.116	10.793	11.8755
Z-103	0	0.0805673	8418.88	404.424	0.480611	16.0337	2.51998	0.0558845	2.90658	0.480362	3.84688	0.0623685	2.51998	0.655071	390.013	9.53686	398.321	12.6754	446.794	74.0067	2.08572	12.7085	2.25398	391	9.46573	10.5742
Z-104	0	0.136503	15217.6	617.43	0.714925	15.0948	2.21593	0.0555213	2.64787	0.506927	3.45276	0.0662482	2.21593	0.641785	413.512	8.87544	416.381	11.7942	432.284	61.4406	0.688853	4.34238	0.732345	413.908	8.78675	10.0792
Z-105	0	0.0878215	5345.64	439.768	0.376764	25.625	2.8934	0.0510526	3.04477	0.274579	4.20028	0.0390244	2.8934	0.688857	246.783	7.00546	246.348	9.18798	242.182	68.9691	-0.17663	-1.89957	-0.18174	246.744	6.96935	7.60759
Z-106	0	0.0633121	8891.85	376.923	0.532344	15.0657	2.31072	0.0572076	2.80541	0.523332	3.63452	0.066376	2.31072	0.63577	414.285	9.27185	427.375	12.6789	498.566	74.8963	3.06275	16.9046	3.41423	415.656	9.21155	10.4823
Z-107	0	0.0653015	24072.2	483.97	0.827874	11.2757	4.23574	0.0858899	5.11711	1.04981	6.64276	0.0886863	4.23574	0.637647	547.763	22.2434	728.789	34.5576	1334.85	2733.89	24.8393	58.9643	43.0937	Discordant	Discordant	Discordant
Z-108	0	0.0580955	15382.8	472.371	3.58165	12.517	3.62151	0.063549	3.21171	0.699713	4.8405	0.0798911	3.62151	0.748168	495.473	17.2714	538.619	20.2359	725.713	108.67	8.01057	31.726	9.21677	501.469	17.1489	18.1748
Z-109	0	0.0864986	4928.36	363.487	0.418196	23.9441	2.86894	0.0515171	3.28621	0.296528	4.36234	0.041764	2.86894	0.657661	263.758	7.41434	263.685	10.1309	263.044	75.2476	-0.0276498	-0.271283	-0.0250401	263.741	7.37859	8.06242
Z-110	0	0.0464176	14910	589.872	0.460389	14.5874	2.0927	0.0583265	2.47919	0.551061	3.24434	0.0685522	2.0927	0.64503	427.427	8.65466	445.691	11.7043	541.078	70.0203	4.09788	21.0045	4.63536	429.295	8.6023	10.0374
Z-111	0	0.1788	17265.8	117.094	0.615989	3.96016	2.20759	0.0932499	2.40537	3.24525	3.26485	0.252515	2.20759	0.676169	1451.43	28.6907	1468.04	25.3471	1492.13	46.3566	1.13125	2.72712	1.10463	1462.71	24.4703	27.9226
Z-112	0	0.101282	8297.53	330.303	78.6539	13.1808	2.48482	0.0562701	2.40757	0.588369	3.45988	0.0758681	2.48482	0.718182	471.413	11.2957	469.825	13.0141	462.099	52.4585	-0.337861	-2.01548	-0.323798	470.994	11.0399	12.346
Z-113	0	0.0968824	5436.24	244.017	0.511687	15.577	2.98789	0.0566884	2.7504	0.501559	4.06106	0.0641971	2.98789	0.735741	401.1	11.6192	412.757	13.7745	478.448	72.9654	2.8242	16.1665	2.89769	403.19	11.4917	12.4733
Z-114	0	0.341915	2044.22	93.2845	0.267714	16.3057	2.41866	0.055094	4.52844	0.46567	5.13387	0.0613283	2.41866	0.471119	383.699	9.0096	388.193	16.5636	415.046	109.053	1.15782	7.55267	1.33319	383.916	8.9806	10.1013
Z-115	0	0.08475	12921.2	526.193	0.36424	14.3493	2.81567	0.0576221	2.74788	0.553438	3.93432	0.0696896	2.81567	0.71567	434.285	11.8252	447.246	14.2332	514.444	71.686	2.89795	15.5816	3.03044	436.563	11.6867	12.7973
Z-116	0	0.144217	1443.74	120.529	0.170234	27.2076	2.57753	0.0517199	5.02015	0.261987	5.64319	0.0367545	2.57753	0.45675	232.684	5.89054	236.267	11.896	272.025	136.285	1.51646	14.4624	1.67512	232.76	5.88546	6.56363
Z-117	0	0.218874	9146.25	405.838	0.7401	14.9969	2.06236	0.0546058	2.77753	0.501821	3.45948	0.0666804	2.06236	0.596147	416.125	8.31086	412.935	11.7379	395.121	59.6153	-0.77261	-5.31572	-0.826182	415.725	8.22896	9.59372
Z-118	0	0.138751	4727.27	197.856	0.65286	14.3523	2.69356	0.0555584	3.43925	0.533507	4.36849	0.0696752	2.69356	0.616589	434.199	11.3102	434.135	15.4329	433.773	76.5395	-0.0147806	-0.0980815	-0.0168567	434.194	11.1887	12.314
Z-119	0	0.454792	3983.97	178.503	0.454194	15.3084	2.74509	0.0535019	2.93852	0.481673	4.02125	0.0653237	2.74509	0.682646	407.921	10.8508	399.22	13.2744	349.169	58.8071	-2.17947	-16.8261	-2.12331	406.111	10.6583	11.6949
Z-120	0	0.0248994	16649.7	654.14	2.52368	15.3749	2.40748	0.0560415	2.41537	0.502354	3.41027	0.0650411	2.40748	0.705949	406.211	9.47768	413.295	11.5791	453.026	59.6103	1.71411	10.3339	1.76672	407.422	9.36816	10.5638
Z-121	0	0.0482399	13345.2	568.082	0.448175	14.9664	1.96095	0.056836	2.53563	0.523383	3.20542	0.0668164	1.96095	0.61176	416.947	7.91733	427.409	11.1826	484.237	65.0504	2.44765	13.896	2.73929	417.979	7.86575	9.32972
Z-122	0	0.0446907	4113.43	342.988	0.57061	25.0357	2.34356	0.0508181	3.42341	0.27975	4.14874	0.0399429	2.34356	0.564884	252.479	5.80262	250.459	9.2088	231.559	73.3738	-0.806445	-9.03442	-0.853183	252.356	5.78401	6.56626
Z-123	0	0.309968	3537.49	154.77	0.50231	14.8179	2.76862	0.0535035	3.75268	0.497632	4.66346	0.067486	2.76862	0.593683	420.992	11.2832	410.098	15.7353	349.237	73.5529	-2.65633	-20.5462	-2.77278	419.451	11.1409	12.1869
Z-124	0	0.641536	1155.33	93.2939	0.176238	26.4179	2.42909	0.0473931	6.12658	0.247246	6.59056	0.0378532	2.42909	0.36857	239.512	5.7112	224.337	13.2664	68.0301	85.6884	-6.76445	-252.068	-7.08113	238.993	5.69633	6.38457
Z-125	0	0.0698697	16296.9	635.439	0.263435	14.9162	1.9972	0.05668	2.65956	0.523703	3.32597	0.0670414	1.9972	0.600487	418.306	8.08914	427.622	11.6079	478.123	67.0874	2.17856	12.5107	2.43701	419.221	8.0366	9.47864
Z-126	0	0.88351	6431.84	225.026	0.375275	15.8419	2.6901	0.0663564	6.38218	0.57728	6.92596	0.0631235	2.6901	0.388409	394.594	10.2966	462.712	25.7443	816.747	815.232	14.7215	51.6872	19.6502	Discordant	Discordant	Discordant
Z-127	0	0.230055	2800.98	133.846	0.471884	15.6742	3.08668	0.0532735	4.35929	0.468422	5.34144	0.0637991	3.08668	0.577874	398.688	11.9334	390.099	17.3028	339.498	87.0505	-2.20195	-17.4346	-2.33412	397.67	11.8142	12.7195
Z-128	0	1.40687	1671.73	137.959	0.352848	26.2652	4.01075	0.0402184	4.78285	0.211036	6.24193	0.0380732	4.01075	0.642549	240.879	9.48277	194.422	11.045	0	33.6311	-23.8951	171.263	-17.7182	225.446	9.05462	9.45234
Z-129	0	0.1778	3998.97	336.701	0.38834	25.6988	2.61988	0.0509535	3.07831	0.273258	4.04225	0.0389123	2.61988	0.648124	246.087	6.32569	245.295	8.80888	237.719	68.8122	-0.322878	-3.52042	-0.328204	246.008	6.29882	6.99415
Z-130	0	0.0209937	12892	556.105	0.53626	14.7073	2.34344	0.0585422	3.07309	0.548589	3.86466	0.0679933	2.34344	0.606377	424.055	9.61767	444.072	13.9021	549.17	89.4595	4.5077	22.7827	5.23252	425.615	9.57524	10.8705
Z-131	0	0.0138699	57290	1085.54	2.68151	8.70185	2.23816	0.0647101	2.37216	1.02488	3.26137	0.114918	2.23816	0.686266	701.247	14.8715	716.363	16.7626	763.988	53.814	2.11009	8.21226	2.18218	705.755	14.373	16.3917
Z-132	0	0.561385	2621.97	216.477	0.421684	26.0303	2.98151	0.0473791	4.51731	0.250853	5.41253	0.0384167	2.98151	0.550854	243.011	7.11055	227.269	11.022	67.3629	62.9297	-6.92699	-260.75	-6.84083	241.523	7.05806	7.63914
Z-133	0	0.300145	19457.1	654.868	0.580527	14.6166	2.03652	0.0603891	7.08434	0.569409	7.37125	0.0684153	2.03652	0.276278	426.601	8.40658	457.632	27.1621	616.587	242.658	6.78079	30.8125	8.58699	426.857	8.40362	9.90151
Z-134	0	0.0447653	12520.3	529.159	0.667279	14.6236	2.08735	0.0572885	2.47659	0.539916	3.23891	0.0683828	2.08735	0.64446	426.405	8.61258	438.369	11.5313	501.699	64.2684	2.72921	15.0077	3.01096	427.823	8.54556	9.96539
Z-135	0	0.0361031	10697.7	441.164	1.71323	13.8994	2.09456	0.0575258	2.61715	0.570399	3.35212	0.0719455	2.09456	0.624848	447.866	9.06238	458.272	12.3634	510.812	65.3956	2.27079	12.3227	2.52364	449.098	8.98511	10.4557
Z-136	0	0.0323681	1431.79	116.982	0.387069	24.9192	4.70197	0.0512372	6.17528	0.283376	7.76161	0.0401297	4.70197	0.605798	253.637	11.6944	253.332	17.4034	250.494	140.476	-0.120122	-1.25444	-0.128833	253.621	11.6538	12.067
Z-137	0	0.270105	11857.9	151.163	0.351826	6.53752	3.65474	0.0838714	2.77402	1.76812	4.58827	0.152963	3.65474	0.796538	917.552	31.2569	1033.83	29.7667	1288.71	74.4498	11.2475	28.8005	11.6212	Discordant	Discordant	Discordant
Z-138	0	0.649147	1326.58	105.823	0.640482	25.6009	2.47631	0.0467207	6.49084	0.251516	6.94716	0.0390611	2.47631	0.356449	247.011	6.00105	227.807	14.1774	33.952	83.8513	-8.42966	-627.529	-8.7591	246.307	5.98261	6.66906
Z-139	0	0.0228309	3103.08	250.262	0.423256	24.9534	3.04351	0.0519637	4.97172	0.287	5.82932	0.0400747	3.04351	0.522104	253.296	7.55959	256.195	13.2001	282.839	127.347	1.1318	10.4451	1.23523	253.414	7.54699	8.17545
Z-140	0	0.40844	14629.4	490.637	0.450341	15.9114	3.32277	0.0720422	5.30714	0.624009	6.26151	0.062848	3.32277	0.530666	392.923	12.666	492.357	24.434	986.227	880.93	20.1956	60.159	29.1332	Discordant	Discordant	Discordant
Z-141	0	0.0831889	45939.1	1663.31	0.842995	13.4795	1.73119	0.0559082	2.28473	0.571629	2.86654	0.0741868	1.73119	0.603932	461.331	7.70745	459.068	10.5869	447.736	49.493	-0.492981	-3.0364	-0.530465	461.012	7.61395	9.34423
Z-142	0	0.0111779	3298.17	130.743	0.427293	13.4577	4.41117	0.0579213	4.00732	0.593172	5.95962	0.0743071	4.41117	0.740176	462.053	19.6686	472.892	22.534	525.853	99.576	2.29208	12.1328	2.28556	464.577	19.3279	20.0941
Z-143	0	0.120325	1870.49	76.9162	0.262743	15.5724	2.86419	0.0605961	5.51478	0.536292	6.21421	0.0642162	2.86419	0.46091	401.215	11.1413	435.977	22.0298	623.968	220.161	7.97323	35.6994	9.95315	401.833	11.1346	12.1967
Z-144	0	0.0323728	15590.1	587.886	0.601673	14.6799	2.01335	0.056068	2.62454	0.526386	3.30784	0.0681204	2.01335	0.608661	424.822	8.27742	429.408	11.5833	454.1	61.9726	1.06811	6.44762	1.17333	425.339	8.20781	9.64699
Z-145	0	0.0650037	7117.71	274.784	0.754768	13.0649	2.31763	0.0564931	2.87197	0.59594	3.69047	0.0765411	2.31763	0.628003	475.444	10.6225	474.654	13.9935	470.836	63.0286	-0.166486	-0.978701	-0.177222	475.318	10.4739	11.8642
Z-146	0	0.0905903	20925.4	773.024	0.348017	15.2852	2.32329	0.0566837	2.78599	0.511092	3.62759	0.0654228	2.32329	0.640451	408.52	9.19665	419.183	12.4589	478.265	72.2528	2.54377	14.5828	2.80309	409.699	9.13144	10.3759
Z-147	0	0.144171	5762.58	467.063	0.417044	25.71	2.49628	0.050865	2.8342	0.272666	3.77679	0.0388954	2.49628	0.660953	245.983	6.02473	244.823	8.21633	233.736	62.5023	-0.473881	-5.23972	-0.482825	245.87	5.99646	6.72171
Z-148	0	0.33993	2971.69	245.503	0.350709	25.6772	3.3368	0.0494383	3.50297	0.265356	4.83788	0.038945	3.3368	0.689724	246.29	8.0632	238.974	10.3019	167.632	62.7733	-3.06178	-46.9233	-2.93619	245.226	7.99173	8.53924
Z-149	0	0.358173	1741.71	74.8642	0.231133	15.161	2.34004	0.0542037	4.90095	0.492735	5.43094	0.0659587	2.34004	0.430872	411.762	9.33412	406.773	18.2046	378.523	102.822	-1.22661	-8.78133	-1.40338	411.493	9.29402	10.4944
Z-150	0	0.001297	16786.2	624.936	0.618517	14.4136	2.3066	0.0565713	2.41346	0.540922	3.33844	0.0693787	2.3066	0.690921	432.412	9.64685	439.032	11.9	473.898	58.2225	1.508	8.75425	1.56407	433.573	9.52477	10.833
ZZA						Isotopic Ratios + measurement Uncertainty (2s)									Ages uncorrected for common lead + measurement Uncertainty (2s)
						Data for Tera-Wasserburg plot				Data for Wetherill plot
Sample	Is rejected?	% common lead (f206c)	206Pb (mV)	U (ppm)	U/Th	238U/206Pb	238U/206Pb Uncertainty ( % 2s)	207Pb/206Pb	207Pb/206Pb Uncertainty (% 2s)	207Pb/235U	207Pb/235U Uncertainty (% 2s)	206Pb/238U	206Pb/238U Uncertainty (% 2s)	r	Age 206Pb/238U	Age 206Pb/238U measurement Uncertainty (2s)	Age 207Pb/235U	Age 207Pb/235U measurement Uncertainty (2s)	Age 207Pb/206Pb	Age 207Pb/206Pb measurement Uncertainty (2s)	Discordance 206Pb/238U vs 207Pb/235U (%)	Discordance 206Pb/238U vs 207Pb/206Pb (%)	Distance to Concordia	Best age (Concordia)	Best age measurement Uncertainty (2S)	Best age Systematic Uncertainty (2S)
Z-1	0	0.0405475	26974.5	402.597	0.843234	3.52052	2.82867	0.0983517	3.92434	3.85024	4.83754	0.284049	2.82867	0.584732	1611.72	40.3377	1603.32	39.0115	1592.28	72.7542	-0.524137	-1.22123	-0.57189	1607.12	35.2179	37.9795
Z-2	0	0.560485	1219.13	370.087	0.405153	38.2327	3.89631	0.0465266	5.46218	0.167717	6.70944	0.0261556	3.89631	0.58072	166.443	6.40211	157.436	9.78521	23.9673	70.8416	-5.72076	-594.457	-5.57509	165.738	6.37287	6.69442
Z-3	0	0.188766	4012.69	399.303	0.494442	13.5863	3.63388	0.0550574	4.62873	0.558504	5.88474	0.0736035	3.63388	0.617509	457.829	16.0599	450.552	21.4161	413.558	95.3303	-1.61514	-10.7048	-1.68634	456.642	15.8241	16.7044
Z-4	0	0.11044	2826.93	349.909	0.736868	16.7336	4.05851	0.0545837	4.45378	0.44956	6.02558	0.0597602	4.05851	0.673546	374.167	14.7533	376.971	18.9771	394.214	104.878	0.743876	5.0854	0.776614	374.555	14.6137	15.2938
Z-5	0	0.338694	3741.34	402.201	1.41002	14.4681	4.87854	0.0543416	4.40189	0.517645	6.5709	0.0691174	4.87854	0.742446	430.836	20.3315	423.577	22.7609	384.233	90.2134	-1.71378	-12.1288	-1.55858	428.697	19.8097	20.4479
Z-6	0	0.000750747	222866	954.024	0.501843	2.18545	2.92694	0.201209	4.07896	12.6887	5.02045	0.457572	2.92694	0.583004	2428.83	59.2327	2656.83	47.287	2835.3	71.7717	8.58158	14.3362	10.9904	Discordant	Discordant	Discordant
Z-7	0	0.446288	2178.3	248.277	0.498582	16.205	3.03173	0.0539646	5.06082	0.458959	5.89943	0.0617095	3.03173	0.513902	386.013	11.3594	383.533	18.8461	368.573	109.59	-0.646618	-4.73197	-0.717424	385.825	11.2973	12.2017
Z-8	0	0.0364627	13516.4	379.101	0.907435	5.42816	3.84658	0.0771127	3.94963	1.95788	5.51324	0.184225	3.84658	0.697699	1090.01	38.5751	1101.15	37.071	1123.26	80.4884	1.01185	2.95961	0.959662	1096.23	34.8666	36.579
Z-9	0	0.353235	3555.8	427.784	0.394229	16.9183	3.91593	0.0551069	4.4774	0.448912	5.94824	0.0591076	3.91593	0.658334	370.196	14.0882	376.517	18.7149	415.568	112.169	1.67885	10.9181	1.7946	370.944	13.9863	14.6879
Z-10	0	2.51687	17341.2	780.479	0.46378	14.6504	5.36051	0.118039	20.2635	1.11042	20.9605	0.0682574	5.36051	0.255744	425.649	22.08	758.375	112.44	1925.95	364.457	43.8736	77.8993	77.6945	Discordant	Discordant	Discordant
Z-11	0	0.00295213	1668.79	193.681	0.852219	16.4062	3.76643	0.0575696	5.89748	0.483612	6.99759	0.0609525	3.76643	0.538247	381.416	13.949	400.548	23.1649	512.463	183.614	4.77646	25.572	5.63606	382.26	13.9195	14.6847
Z-12	0	0.00727131	185818	1662.99	19.3154	2.98042	2.75053	0.114151	3.64083	5.27856	4.56301	0.335523	2.75053	0.602789	1865.1	44.5458	1865.4	38.9718	1865.72	65.723	0.0162244	0.0334025	0.0171647	1865.3	36.8762	39.9965
Z-13	0	0.565052	2723.64	258.83	1.08607	15.7682	3.61393	0.062774	8.25202	0.548668	9.00868	0.0634188	3.61393	0.40116	396.384	13.8935	444.124	32.4183	699.634	461.799	10.7493	43.3441	13.8292	Discordant	Discordant	Discordant
Z-14	0	0.0111593	159458	868.436	1.27415	2.11684	3.13674	0.155216	3.55936	10.1056	4.74428	0.472403	3.13674	0.661163	2494.09	64.8758	2444.48	43.8622	2403.45	59.4408	-2.02928	-3.77119	-2.39277	2445.02	43.8088	47.2518
Z-15	0	0.0019114	32925.3	167.845	0.499144	2.10453	3.4119	0.16861	3.70912	11.0418	5.03971	0.475164	3.4119	0.677003	2506.17	70.8464	2526.66	46.9562	2543.15	62.6062	0.811057	1.45414	0.999818	2526.99	46.9007	50.1547
Z-16	0	0.892272	16512.6	192.341	0.75078	3.75909	3.36271	0.123005	6.31581	4.50974	7.15523	0.266022	3.36271	0.469965	1520.58	45.5494	1732.77	59.5348	1999.48	135.829	12.2459	23.9513	22.4586	Discordant	Discordant	Discordant
Z-17	0	0.0859169	4213.02	510.664	0.549695	15.9877	3.50472	0.0548346	4.64915	0.472694	5.82217	0.0625479	3.50472	0.601961	391.102	13.2995	393.048	18.9772	404.491	107.336	0.495071	3.31011	0.540178	391.299	13.2007	14.0092
Z-18	0	0.119226	8633.64	370.707	2.08791	8.97012	4.3894	0.0866131	4.31174	1.33075	6.15288	0.111481	4.3894	0.71339	681.345	28.3807	859.209	35.6852	1351.04	241.804	20.7009	49.569	35.9672	Discordant	Discordant	Discordant
Z-19	0	0.0410726	18896.8	181.969	0.441981	2.88058	3.25172	0.12177	3.69037	5.82603	4.91859	0.347152	3.25172	0.661108	1920.98	54.0174	1950.29	42.6511	1981.53	66.8642	1.50266	3.0557	1.56124	1944.88	42.1748	45.0419
Z-20	0	0.0646078	5619.23	625.833	0.518875	14.8925	3.92399	0.0558368	4.55239	0.516733	6.01016	0.0671481	3.92399	0.652894	418.951	15.9168	422.967	20.7938	444.897	106.995	0.949493	5.83201	1.00948	419.52	15.7501	16.5256
Z-21	0	0.218588	4104.08	511.215	0.587673	16.2394	3.50976	0.0534861	4.60747	0.453925	5.79199	0.0615787	3.50976	0.605967	385.219	13.1242	380.024	18.3632	348.513	95.9381	-1.36707	-10.5323	-1.44118	384.583	12.9971	13.7826
Z-22	0	1.22643	1144.5	137.741	0.496453	16.8369	3.19359	0.0462134	4.90162	0.378284	5.8502	0.0593934	3.19359	0.545893	371.935	11.5419	325.775	16.3049	7.71662	59.6735	-14.1694	-4719.93	-13.0879	Discordant	Discordant	Discordant
Z-23	0	0.61748	2265.72	209.598	0.44973	16.5307	3.28296	0.0675867	10.6043	0.563486	11.1009	0.0604937	3.28296	0.295739	378.627	12.0722	453.793	40.6452	854.981	8025.68	16.5639	55.7152	22.2087	Discordant	Discordant	Discordant
Z-24	0	0.0331158	27370.6	296.914	0.259362	3.24113	3.5413	0.121897	3.89231	5.18331	5.26221	0.308534	3.5413	0.672968	1733.49	53.8268	1849.88	44.8194	1983.38	75.2935	6.29174	12.5992	6.64886	1816.13	44.7238	47.277
Z-25	0	0.948778	1634.38	196.861	0.715246	16.4586	3.89366	0.0474395	5.04298	0.397247	6.37121	0.0607587	3.89366	0.611135	380.238	14.377	339.65	18.3944	70.377	66.7224	-11.95	-440.287	-10.6884	Discordant	Discordant	Discordant
Z-26	0	0.495608	2017.36	243.428	0.664321	16.271	2.87486	0.0507469	4.85541	0.429841	5.64268	0.0614592	2.87486	0.509485	384.493	10.7304	363.064	17.2257	228.357	81.3411	-5.90242	-68.3737	-6.18437	Discordant	Discordant	Discordant
Z-27	0	0.585675	3373.73	405.22	0.586368	16.2435	2.70641	0.0516667	4.96792	0.438373	5.65729	0.0615632	2.70641	0.478394	385.125	10.1178	369.105	17.5087	269.667	89.2563	-4.34033	-42.8153	-4.6996	383.847	10.044	11.0144
Z-28	0	0.60168	1376.47	150.28	1.16282	15.0036	3.57022	0.050751	4.942	0.466186	6.0967	0.0666505	3.57022	0.585598	415.944	14.3812	388.551	19.6857	228.539	80.3732	-7.04997	-82.0017	-6.93669	Discordant	Discordant	Discordant
Z-29	0	0.226156	1899.91	244.824	0.676521	16.8478	3.20137	0.051771	6.02471	0.423503	6.82246	0.059355	3.20137	0.46924	371.702	11.563	358.553	20.6124	274.291	111.212	-3.66723	-35.5138	-4.00044	370.783	11.4931	12.3034
Z-30	0	0.593339	1932.93	191.221	0.746299	13.996	3.34598	0.052886	5.30065	0.520773	6.26837	0.0714488	3.34598	0.533788	444.879	14.3835	425.667	21.7989	322.941	96.4191	-4.51319	-37.7585	-4.79167	442.474	14.2026	15.1048
Z-31	0	3.20142	17470.5	907.147	0.389112	19.7034	4.53934	0.12604	6.95164	0.88162	8.30247	0.0507528	4.53934	0.546746	319.142	14.1342	641.857	39.519	2042.67	62.6471	50.2784	84.3763	102.081	282.026	13.4118	14.2325
Z-32	0	0.33428	3164.57	358.069	0.651855	16.0311	4.11637	0.0564556	5.22906	0.48535	6.65489	0.0623786	4.11637	0.618548	390.075	15.5808	401.736	22.0834	469.346	140.536	2.90284	16.8898	3.24805	391.115	15.4988	16.2053
Z-33	0	0.325898	1546.95	150.967	75.7269	14.1591	2.93226	0.0567368	5.66509	0.552258	6.37898	0.070626	2.93226	0.459676	439.926	12.4695	446.474	23.048	480.336	135.972	1.46672	8.41291	1.73005	440.266	12.4209	13.4818
Z-34	0	0.0761268	2795.54	319.812	0.607399	15.579	3.67992	0.0552277	4.79097	0.488574	6.04113	0.0641891	3.67992	0.609145	401.051	14.3087	403.938	20.1356	420.461	111.722	0.714771	4.61629	0.776218	401.373	14.1961	14.9869
Z-35	0	0.291187	4931.81	457.866	0.764822	12.3618	3.24284	0.0550941	4.47284	0.614236	5.5247	0.0808943	3.24284	0.586972	501.458	15.6451	486.228	21.3487	415.051	86.7678	-3.13229	-20.8186	-3.28869	498.893	15.3705	16.4129
Z-36	0	0.259242	4895.87	529.791	0.694941	13.7125	4.18968	0.0520135	5.06288	0.52277	6.57162	0.072926	4.18968	0.637542	453.76	18.3574	427	22.9114	284.986	86.3231	-6.26692	-59.2218	-5.94486	Discordant	Discordant	Discordant
Z-37	0	0.41506	2743.36	338.925	0.62999	15.7437	3.316	0.0521435	5.09322	0.456464	6.07756	0.0635176	3.316	0.545614	396.983	12.7668	381.796	19.3428	290.691	93.4391	-3.97774	-36.5651	-4.19366	395.255	12.6338	13.4642
Z-38	0	0.100196	5655.05	594.597	0.908894	13.7213	3.20318	0.0548875	4.18645	0.551303	5.27131	0.0728795	3.20318	0.607663	453.48	14.0266	445.85	19.0236	406.646	85.8512	-1.71139	-11.5172	-1.80186	452.318	13.8319	14.8137
Z-39	0	0.22857	4783.16	370.599	0.564416	11.3759	3.51086	0.0602079	4.79218	0.729427	5.94063	0.0879054	3.51086	0.590991	543.138	18.2876	556.217	25.4468	610.094	115.409	2.35145	10.9748	2.70041	544.824	18.0851	19.1668
Z-40	0	0.265713	1725.88	207.668	0.685453	15.7681	3.14861	0.0517098	4.79288	0.451966	5.73458	0.0634192	3.14861	0.549057	396.386	12.1047	378.655	18.127	271.577	85.1662	-4.68263	-45.9571	-4.8762	394.22	11.9663	12.8322
Z-41	0	0.510317	1676.08	299.813	0.367249	22.7907	3.98951	0.0480636	6.43956	0.29065	7.57523	0.0438775	3.98951	0.526652	276.823	10.8101	259.071	17.3233	101.349	94.3107	-6.85215	-173.139	-6.89296	275.195	10.7273	11.2239
Z-42	0	0.0833652	7099.41	855.944	0.725099	16.2077	2.59358	0.0562134	4.29627	0.478002	5.01842	0.0616989	2.59358	0.516811	385.949	9.71613	396.701	16.4812	459.822	114.3	2.71039	16.0655	3.13869	386.515	9.68581	10.7587
Z-43	0	0.259783	16853.6	1242.75	0.624485	12.1466	2.66463	0.0597881	3.96539	0.678382	4.77751	0.0823279	2.66463	0.557744	510.003	13.066	525.796	19.6096	594.951	99.8146	3.00366	14.2782	3.53937	511.474	12.9708	14.3028
Z-44	0	0.138737	42973.2	1363.47	2.4207	7.52466	3.43119	0.0893601	3.62613	1.6367	4.99218	0.132896	3.43119	0.687312	804.368	25.9469	984.443	31.4751	1411.04	137.25	18.2921	42.9947	30.1747	Discordant	Discordant	Discordant
Z-45	0	0.101729	16763.6	495.702	2.87138	6.74178	3.52304	0.0939745	4.2379	1.92109	5.51104	0.148329	3.52304	0.639269	891.588	29.3356	1088.45	36.8177	1506.76	142.899	18.0862	40.8276	30.3903	Discordant	Discordant	Discordant
Z-46	0	0.342127	3290.83	391.278	0.662028	16.6548	3.64522	0.0540894	4.71904	0.447594	5.96297	0.0600427	3.64522	0.61131	375.885	13.31	375.593	18.7231	373.771	105.69	-0.0777438	-0.565552	-0.0804556	375.843	13.2054	13.9549
Z-47	0	0.0174322	68079.2	733.933	0.163883	3.11012	2.93109	0.121964	3.80314	5.40465	4.80158	0.321531	2.93109	0.610442	1797.2	45.9719	1885.59	41.1646	1984.37	71.8262	4.68771	9.43221	5.36039	1849.45	39.4508	42.4356
Z-48	0	0.481808	2886.93	349.863	0.775791	16.3643	3.43781	0.0516389	4.62197	0.434902	5.76031	0.0611087	3.43781	0.59681	382.364	12.7627	366.652	17.7292	268.432	83.1622	-4.28547	-42.4437	-4.34135	380.075	12.5955	13.3735
Z-49	0	0.00724777	76136.9	734.144	1.25448	2.68806	3.62563	0.117492	4.23334	6.02397	5.57372	0.372015	3.62563	0.650487	2038.88	63.3729	1979.32	48.5743	1917.63	73.4661	-3.00914	-6.32253	-3.12123	1987.27	47.7186	50.3504
Z-50	0	0.209262	7680.13	814.505	0.463063	14.2095	2.90958	0.0546222	4.33578	0.529789	5.22155	0.0703755	2.90958	0.557225	438.418	12.332	431.669	18.3632	395.793	89.4983	-1.56328	-10.7695	-1.69954	437.644	12.2099	13.2511
Z-51	0	5.30716	2055.63	90.9561	0.377035	20.3182	3.99342	0.138854	7.81844	0.941856	8.77926	0.049217	3.99342	0.45487	309.713	12.0757	673.853	43.2631	2212.19	61.2505	54.0386	85.9997	107.687	283.498	11.6251	12.5233
Z-52	0	0.081827	6177.97	648.055	1.46385	15.0542	3.38412	0.0575862	4.08809	0.527196	5.30705	0.0664264	3.38412	0.637665	414.59	13.5886	429.947	18.6041	513.105	112.758	3.5718	19.1998	4.01596	416.116	13.5076	14.4097
Z-53	0	0.043902	3081.85	356.828	0.538932	15.4076	4.65998	0.053254	5.04792	0.476352	6.87	0.0649028	4.65998	0.678308	405.373	18.3086	395.567	22.5111	338.627	99.5396	-2.47907	-19.711	-2.41288	403.351	17.9832	18.6076
Z-55	0	0.411241	2568.33	111.508	0.641758	7.27777	3.3282	0.0641428	4.30896	1.21468	5.44463	0.137405	3.3282	0.61128	829.97	25.9187	807.339	30.3304	745.402	84.2313	-2.80322	-11.3453	-2.89848	822.71	24.6744	26.1962
Z-56	0	0.430523	2449.2	424.062	0.354812	22.2375	3.82814	0.0493654	5.46786	0.305949	6.67474	0.0449691	3.82814	0.573526	283.56	10.6198	271.036	15.879	164.182	91.2555	-4.62091	-72.7111	-4.66621	282.279	10.5391	11.0768
Z-57	0	0.693492	5714.4	463.804	0.416033	15.514	4.77427	0.0731273	9.77397	0.649633	10.8777	0.0644579	4.77427	0.438905	402.679	18.6369	508.253	43.5224	1016.58	1606.16	20.7718	60.3889	29.7379	Discordant	Discordant	Discordant
Z-58	0	5.01766	29589.8	363.421	1.57111	7.90266	12.1049	0.213975	43.9427	3.73165	45.5795	0.12654	12.1049	0.265577	768.095	87.6513	1578.18	382.06	2935.17	3322.61	51.3305	73.8314	123.641	Discordant	Discordant	Discordant
Z-59	0	0.000605942	2160	343.78	0.74716	19.9859	3.00109	0.0528329	4.38704	0.364328	5.31533	0.0500352	3.00109	0.564611	314.738	9.21869	315.441	14.4133	320.659	101.4	0.222832	1.84657	0.244944	314.778	9.1812	9.95065
Z-60	0	0.000778577	60368.2	571.103	6.4321	2.64029	3.54173	0.119024	3.8634	6.2129	5.24116	0.378746	3.54173	0.675754	2070.42	62.7188	2006.27	45.8709	1940.83	66.7636	-3.19779	-6.67726	-3.47471	2010.15	45.5775	48.3816
Z-61	0	0.084053	3934.38	453.419	0.741898	15.0306	2.99102	0.0532527	4.74436	0.488291	5.60849	0.0665311	2.99102	0.533302	415.223	12.0279	403.745	18.686	338.571	92.1107	-2.84278	-22.6398	-3.06829	414.023	11.9164	12.8744
Z-62	0	0.201771	6711.74	67.3765	0.247798	2.91937	3.18006	0.115056	4.75082	5.43167	5.71691	0.34254	3.18006	0.556255	1898.88	52.3043	1889.87	49.0613	1879.96	85.1131	-0.476848	-1.00604	-0.545828	1893.68	44.4815	47.1323
Z-63	0	1.7447	2280.33	130.827	0.381337	15.3682	3.35722	0.0928916	7.79668	0.833038	8.48876	0.0650693	3.35722	0.39549	406.381	13.222	615.296	39.1907	1484.84	209.579	33.9536	72.6312	55.4271	Discordant	Discordant	Discordant
Z-64	0	0.179092	5026.85	678.775	0.840361	19.0463	3.7364	0.0576346	5.87384	0.417048	6.96151	0.0525037	3.7364	0.536722	329.875	12.0154	353.938	20.8063	514.922	248.168	6.79864	35.9369	8.10909	330.395	12.008	12.698
Z-65	0	0.26655	5931.97	699.754	0.511823	15.7345	2.80238	0.0528989	4.40186	0.463346	5.21821	0.0635546	2.80238	0.537039	397.207	10.7953	386.582	16.7784	323.465	85.563	-2.74828	-22.7974	-2.95301	396.129	10.7021	11.6825
Z-66	0	0.0435869	2423.97	297.189	0.519935	15.9535	4.27355	0.0545935	4.2519	0.471625	6.02843	0.0626821	4.27355	0.7089	391.916	16.2498	392.311	19.6195	394.615	95.9427	0.100579	0.683945	0.100689	391.989	16.0225	16.6949
Z-67	0	0.331591	2263.56	254.941	0.7154	16.2793	4.5034	0.0566486	4.89443	0.479584	6.65102	0.0614276	4.5034	0.6771	384.302	16.8009	397.787	21.8933	476.894	136.726	3.3902	19.4157	3.7027	385.825	16.6955	17.3385
Z-68	0	0.634981	3860.11	321.392	0.501133	14.5763	3.37799	0.0652213	6.35244	0.616673	7.19474	0.0686045	3.37799	0.469508	427.743	13.9801	487.76	27.8732	780.551	383.513	12.3046	45.1999	16.2706	Discordant	Discordant	Discordant
Z-69	0	1.91996	14266.3	71.3225	0.606068	2.34997	6.05962	0.168906	9.01171	9.90592	10.8596	0.425538	6.05962	0.557999	2285.57	116.607	2426.06	100.482	2546.09	159.61	5.79078	10.2319	7.45916	2370.22	97.0136	98.6413
Z-70	0	0.0390671	3132.26	365.447	0.422831	16.0845	3.20288	0.0560112	4.43584	0.479931	5.4713	0.0621716	3.20288	0.585396	388.819	12.0853	398.026	18.0179	451.823	114.707	2.31314	13.9444	2.60359	389.551	12.0258	12.9137
Z-71	0	0.49333	3558.01	357.132	0.691895	15.3577	4.4436	0.0616818	8.5763	0.553531	9.65912	0.0651138	4.4436	0.460042	406.651	17.5118	447.307	34.9592	662.141	378.482	9.08922	38.5855	11.5104	Discordant	Discordant	Discordant
Z-72	0	0.0138919	1877.91	203.259	0.558385	14.8093	3.54513	0.0549159	5.57822	0.511064	6.60943	0.067525	3.54513	0.536375	421.227	14.4556	419.164	22.7017	407.805	121.394	-0.492216	-3.29138	-0.546667	421.038	14.3523	15.1959
Z-73	0	1.71984	19094.7	204.981	0.763703	4.60905	8.3653	0.155885	10.7517	4.66127	13.6227	0.216964	8.3653	0.614072	1265.82	96.1414	1760.32	114.37	2410.75	329.773	28.0916	47.4929	72.3045	Discordant	Discordant	Discordant
Z-74	0	0.152796	11059.7	943.741	0.8527	12.5786	3.47877	0.0552487	4.28448	0.605345	5.51893	0.0795003	3.47877	0.630334	493.139	16.5154	480.62	21.134	421.306	84.7703	-2.60486	-17.0501	-2.64827	490.636	16.1846	17.1551
Z-75	0	0.112952	4910.81	933.035	2.38836	23.2417	3.13455	0.0499789	4.58943	0.296367	5.55772	0.0430261	3.13455	0.563999	271.563	8.33547	263.559	12.9019	193.023	83.8297	-3.03676	-40.6893	-3.14115	270.917	8.29056	8.92202
Z-76	0	0.432154	1186.4	132.447	0.788403	16.3354	3.65027	0.0549674	5.70287	0.463753	6.77106	0.0612166	3.65027	0.5391	383.02	13.574	386.865	21.7857	409.903	135.986	0.993792	6.55846	1.11627	383.295	13.5098	14.2757
Z-77	0	0.0916948	11613.9	1042.44	0.638683	13.9716	3.59604	0.0545529	3.65948	0.538126	5.13063	0.0715737	3.59604	0.700897	445.63	15.4837	437.188	18.228	392.948	74.2963	-1.93089	-13.4067	-1.84622	443.555	15.1387	16.0127
Z-78	0	1.21441	9530.31	638.946	0.572014	14.1677	4.45554	0.0748831	9.51103	0.728444	10.5029	0.070583	4.45554	0.424219	439.667	18.9364	555.64	44.9744	1064.51	5933.05	20.8719	58.6976	30.3677	Discordant	Discordant	Discordant
Z-79	0	0.683971	506.705	57.6465	0.814418	16.1604	3.42733	0.0510207	9.20765	0.435117	9.82483	0.0618796	3.42733	0.348843	387.046	12.875	366.804	30.2554	240.779	157.051	-5.51859	-60.7471	-6.17583	Discordant	Discordant	Discordant
Z-80	0	0.148028	2770.59	344.317	0.687932	16.1131	3.57799	0.0518982	4.16279	0.443899	5.48915	0.0620612	3.57799	0.651829	388.148	13.4781	372.998	17.1366	279.952	75.8467	-4.06176	-38.648	-3.94312	385.227	13.2454	14.0092
Z-81	0	1.78707	1666.3	187.818	0.758675	16.0394	3.45234	0.0413544	5.28527	0.355342	6.31291	0.0623466	3.45234	0.54687	389.881	13.0611	308.731	16.8073	0	47.4777	-26.2848	246.14	-21.117	Discordant	Discordant	Discordant
Z-82	0	1.22496	2316.88	211.095	0.862393	17.3518	3.24502	0.0656927	6.05236	0.521777	6.8674	0.0576309	3.24502	0.472525	361.202	11.3987	426.338	23.9131	795.666	2369.07	15.278	54.6039	20.3247	Discordant	Discordant	Discordant
Z-83	0	0.022923	9276.32	949.879	0.353951	14.3842	2.95239	0.0559827	4.0244	0.536389	4.99124	0.0695206	2.95239	0.591515	433.267	12.3713	436.041	17.6954	450.696	92.6273	0.636199	3.86713	0.701599	433.573	12.2653	13.3023
Z-84	0	0.346744	1949.77	237.768	0.882818	16.6237	4.46245	0.0519454	5.29926	0.430657	6.92789	0.0601551	4.46245	0.644129	376.568	16.3228	363.643	21.1782	282.031	98.5244	-3.55452	-33.5202	-3.50743	374.325	16.0795	16.6835
Z-85	0	0.929429	1004.74	148.985	1.25351	20.414	3.32219	0.0474217	7.4382	0.320156	8.1464	0.048986	3.32219	0.407811	308.293	10.001	282.022	20.0626	69.4679	100.624	-9.31513	-343.792	-9.67025	Discordant	Discordant	Discordant
Z-86	0	0.0998802	8344.83	310.7	0.613626	6.5458	4.30186	0.0694184	4.13285	1.46158	5.96543	0.15277	4.30186	0.721131	916.47	36.751	914.663	35.9801	910.282	84.6651	-0.197642	-0.679789	-0.179009	915.492	33.6995	35.0547
Z-87	0	0.0616231	1514.96	189.211	0.799611	16.4925	3.12512	0.0527053	5.72564	0.440432	6.52298	0.0606335	3.12512	0.479093	379.477	11.5168	370.557	20.2544	315.127	112.831	-2.4072	-20.4202	-2.65399	378.856	11.452	12.3049
Z-88	0	0.0604102	2438.68	425.205	0.408418	22.3067	3.97091	0.0528573	4.59299	0.326574	6.07154	0.0448295	3.97091	0.65402	282.7	10.9832	286.947	15.1779	321.709	119.254	1.48021	12.1257	1.56923	283.061	10.9399	11.4832
Z-89	0	1.31095	569.236	83.4441	0.872154	19.7645	3.7769	0.0428122	8.84544	0.298534	9.61805	0.0505957	3.7769	0.392689	318.178	11.7255	265.254	22.4558	0	83.231	-19.952	277.175	-19.1297	Discordant	Discordant	Discordant
Z-90	0	0.0740302	4283.71	154.235	0.174911	6.3611	3.01852	0.0703423	4.56518	1.52404	5.47288	0.157206	3.01852	0.551542	941.229	26.4344	940.104	33.5663	937.45	93.3234	-0.119677	-0.403093	-0.142014	940.953	25.4294	27.272
Z-91	0	1.00069	1146.68	139.697	0.786217	16.1422	4.36561	0.0445513	7.7022	0.380372	8.85338	0.0619493	4.36561	0.4931	387.469	16.4171	327.312	24.7764	0	84.1888	-18.3792	577.365	-16.9493	Discordant	Discordant	Discordant
Z-92	0	0.187683	4120.24	424.978	2.34841	14.4759	3.12825	0.0556612	4.13865	0.529932	5.18791	0.0690805	3.12825	0.602989	430.614	13.0306	431.765	18.2481	437.889	93.5015	0.266566	1.66134	0.292187	430.744	12.9073	13.8826
Z-93	0	0.520522	1931.25	220.832	0.810138	16.5956	3.73598	0.0546196	6.28194	0.453595	7.30892	0.060257	3.73598	0.511153	377.188	13.6873	379.794	23.1624	395.689	147.264	0.686043	4.6755	0.771313	377.361	13.6303	14.3673
Z-94	0	1.1234	650.714	108.529	0.98354	22.7151	3.61806	0.0457053	8.36741	0.277309	9.11613	0.0440235	3.61806	0.396885	277.724	9.83485	248.52	20.0986	0	97.5735	-11.7512	1566.78	-11.8889	275.931	9.77259	10.2957
Z-95	0	0.0488192	2374.43	291.538	0.801715	17.0599	5.32357	0.0562369	4.87053	0.454314	7.21544	0.0586169	5.32357	0.737803	367.209	19.0023	380.296	22.891	460.746	138.719	3.44131	20.3011	3.59838	369.15	18.8541	19.3806
Z-96	0	0.769301	2504.27	280.252	0.629243	15.5994	3.89609	0.0500625	6.16248	0.442299	7.29079	0.0641049	3.89609	0.534384	400.541	15.1305	371.872	22.7058	196.893	96.8096	-7.70942	-103.431	-7.80225	Discordant	Discordant	Discordant
Z-97	0	0.053539	3440.84	393.385	0.428917	15.999	3.71631	0.0589615	5.42785	0.507913	6.57818	0.0625041	3.71631	0.564945	390.836	14.0931	417.045	22.5019	564.707	189.171	6.28437	30.7895	7.53815	391.92	14.0689	14.8713
Z-99	0	0.331259	2147.37	266.729	0.563334	16.5585	3.29465	0.0515814	4.98206	0.429322	5.97291	0.0603918	3.29465	0.551598	378.008	12.0959	362.695	18.2186	265.891	89.7538	-4.22195	-42.1666	-4.40523	376.257	11.9728	12.7726
Z-100	0	0.0522562	14677.8	144.683	4.06469	3.13458	4.57513	0.129481	3.65591	5.69298	5.85641	0.319022	4.57513	0.781218	1784.95	71.3329	1930.3	50.6222	2090.16	70.7866	7.53007	14.6021	10.2509	Discordant	Discordant	Discordant
Z-101	0	0.255442	2097.71	186.673	0.658583	12.3453	2.99406	0.0561818	4.34738	0.627203	5.27865	0.0810028	2.99406	0.567201	502.106	14.4628	494.352	20.6623	458.577	89.6522	-1.56847	-9.49204	-1.71247	501.032	14.2674	15.4039
Z-102	0	0.0281826	4055.69	400.94	0.419493	13.701	3.25614	0.0581185	4.81065	0.58462	5.80903	0.0729873	3.25614	0.560531	454.128	14.2782	467.426	21.7645	533.284	123.674	2.84493	14.8432	3.30283	455.216	14.1965	15.1997
Z-103	0	0.680566	2777.91	327.556	0.608235	16.9748	4.0679	0.0544189	5.34591	0.441832	6.71763	0.0589109	4.0679	0.605555	368.999	14.589	371.544	20.905	387.424	125.621	0.684917	4.75589	0.744683	369.242	14.4944	15.1626
Z-104	0	0.0195808	3894.32	497.861	0.670412	16.5616	3.27524	0.0572776	4.71618	0.476645	5.74191	0.0603808	3.27524	0.57041	377.941	12.0226	395.769	18.8215	501.257	144.29	4.50466	24.6014	5.24501	378.902	11.9911	12.8551
Z-105	0	0.40886	2771.79	258.035	1.59453	13.7877	3.04446	0.0587557	5.10332	0.587312	5.94244	0.0725282	3.04446	0.512325	451.369	13.2717	469.15	22.3291	557.108	138.751	3.78989	18.98	4.53203	452.387	13.2228	14.2933
Z-106	0	0.0531795	18698	459.948	1.72094	6.0271	4.23852	0.106059	3.97881	2.42521	5.81343	0.165917	4.23852	0.729091	989.577	38.8827	1250.1	41.8186	1731.92	132.246	20.8403	42.8626	39.4414	Discordant	Discordant	Discordant
Z-107	0	0.243334	3587.48	428.35	0.455291	15.5048	3.71835	0.0548783	4.35853	0.487805	5.72913	0.0644962	3.71835	0.649026	402.911	14.5231	403.414	19.0752	406.272	98.2728	0.124603	0.827169	0.130761	402.983	14.3678	15.1517
Z-108	0	0.144021	1619.96	145.485	0.643859	15.8068	2.93763	0.0729341	8.00089	0.635914	8.52314	0.0632638	2.93763	0.344666	395.444	11.2676	499.773	33.6532	1011.22	1087.51	20.8753	60.8944	29.4251	Discordant	Discordant	Discordant
Z-109	0	0.0956085	1773.26	280.465	1.04018	21.2149	3.19578	0.0566086	5.88008	0.367751	6.69241	0.0471367	3.19578	0.477522	296.919	9.27365	317.985	18.2728	475.354	271.17	6.625	37.5373	7.84222	297.183	9.27093	9.99637
Z-110	0	0.386062	2722.72	345.299	0.781234	16.5302	3.82427	0.0535093	4.24506	0.446131	5.71363	0.0604953	3.82427	0.669324	378.637	14.063	374.567	17.8995	349.49	89.7396	-1.08667	-8.33978	-1.09462	377.959	13.8871	14.6046
Z-111	0	0.19129	3777.4	464.438	0.765599	16.4166	2.89536	0.0569542	4.51621	0.478141	5.36463	0.0609141	2.89536	0.539713	381.182	10.7167	396.797	17.6219	488.795	131.713	3.93514	22.0159	4.59257	381.961	10.6886	11.6592
Z-112	0	0.680405	2215.1	260.723	0.838134	16.2818	3.43361	0.0532896	5.19803	0.451079	6.2297	0.0614184	3.43361	0.551167	384.246	12.808	378.035	19.6659	340.183	106.656	-1.64288	-12.9524	-1.7725	383.64	12.7111	13.5075
Z-113	0	0.0440604	2572.85	312.712	0.660208	15.9391	3.53685	0.0572308	4.80958	0.494853	5.97004	0.0627386	3.53685	0.592433	392.259	13.4599	408.213	20.0697	499.499	138.453	3.90817	21.4694	4.49236	393.369	13.4093	14.2357
Z-114	0	0.467801	807.29	99.3554	0.892301	16.8438	2.97188	0.0543371	8.08771	0.444599	8.61644	0.059369	2.97188	0.344908	371.787	10.7365	373.49	26.9328	384.047	187.213	0.455975	3.19219	0.536172	371.818	10.7193	11.6171
Z-115	0	0.542136	1411.97	251.709	0.422759	23.2553	2.90597	0.0509328	5.21658	0.301848	5.97138	0.043001	2.90597	0.48665	271.408	7.72331	267.843	14.0592	236.797	107.552	-1.33099	-14.6161	-1.436	271.239	7.70249	8.38718
Z-116	0	0.0766422	7375.79	680.392	0.495481	12.8129	3.32981	0.0608435	4.02377	0.654451	5.22287	0.0780461	3.32981	0.637544	484.45	15.54	511.214	20.9809	632.788	115.963	5.23554	23.4421	6.11119	487.232	15.4382	16.4997
Z-117	0	0.112897	1413.09	208.621	0.62914	21.853	3.42158	0.0623966	7.14745	0.393516	7.92422	0.0457603	3.42158	0.431787	288.44	9.65165	336.935	22.7253	686.819	1243.25	14.393	58.0035	18.3168	287.776	9.64831	10.3559
Z-118	0	1.36839	340.661	137.561	0.569286	124.405	6.27807	0.119643	28.9748	0.132545	29.6472	0.00803826	6.27807	0.211759	51.6108	3.22722	126.382	35.2448	1950.11	26.2496	59.1628	97.3534	95.034	50.7495	3.20086	3.29722
Z-119	0	0.131697	1379.77	255.448	0.739416	22.8791	5.12402	0.0532969	5.84613	0.321051	7.77385	0.043708	5.12402	0.659135	275.776	13.8328	282.711	19.1855	340.492	167.884	2.45309	19.0066	2.64038	276.276	13.7917	14.2105
Z-120	0	0.0439787	2040.29	236.857	0.647103	16.7331	2.54409	0.0624269	4.55409	0.514171	5.21652	0.0597618	2.54409	0.487698	374.177	9.24839	421.25	17.9883	687.83	304.738	11.1747	45.6004	14.2862	Discordant	Discordant	Discordant
Z-121	0	0.172139	3130.88	381.507	0.713746	15.5766	4.14444	0.0565833	5.33275	0.500641	6.75386	0.0641987	4.14444	0.613641	401.11	16.1171	412.136	22.8826	474.345	140.113	2.67553	15.4393	2.99441	402.132	16.0246	16.7422
Z-122	0	0.752631	1236.53	110.88	0.929244	13.1948	2.87342	0.0570575	5.24174	0.595966	5.97766	0.0757873	2.87342	0.480693	470.929	13.0493	474.671	22.6689	492.78	120.381	0.788353	4.43427	0.925448	471.178	12.976	14.1141
Z-123	0	0.0443623	1801.38	168.779	0.748567	16.0553	3.13701	0.0738369	6.32259	0.633824	7.05805	0.0622849	3.13701	0.444458	389.506	11.857	498.475	27.8091	1036.12	590.892	21.8604	62.4071	31.4925	Discordant	Discordant	Discordant
Z-124	0	0.095185	11736.9	354.033	1.05941	5.64034	3.75427	0.0815541	3.74607	1.99275	5.30355	0.177294	3.75427	0.707879	1052.18	36.4463	1113.05	35.8723	1233.99	83.4331	5.46954	14.734	5.62133	1080.82	33.8542	35.6115
Z-125	0	0.0406342	8290.81	748.721	0.42238	12.2145	2.93271	0.0597276	4.28102	0.673927	5.18921	0.0818702	2.93271	0.565155	507.276	14.3066	523.098	21.2163	592.798	108.014	3.02453	14.4267	3.54705	508.806	14.2	15.4152
Z-126	0	0.00247085	6797.63	744.29	0.438849	15.3637	3.66183	0.0616729	4.36376	0.553234	5.69662	0.0650883	3.66183	0.642808	406.496	14.4256	447.113	20.6053	661.83	192.561	9.08431	38.58	11.2359	Discordant	Discordant	Discordant
Z-127	0	0.228406	1979.48	143.558	88.8188	10.5789	3.35577	0.061069	4.80548	0.795598	5.86122	0.0945281	3.35577	0.572538	582.261	18.6829	594.343	26.3755	640.748	112.654	2.03267	9.12789	2.36375	583.855	18.453	19.6429
Z-128	0	0.0169395	3584.43	448.357	0.584488	16.7889	3.65264	0.059234	4.74364	0.486251	5.98698	0.059563	3.65264	0.610097	372.968	13.2366	402.352	19.8912	574.773	189.166	7.30324	35.1105	8.76727	374.095	13.2198	14.0096
Z-129	0	0.197795	2600.7	278.016	0.555703	15.2169	3.33824	0.062854	6.77164	0.569271	7.54976	0.0657164	3.33824	0.442165	410.297	13.2699	457.543	27.8159	702.389	339.859	10.3261	41.5855	13.2821	Discordant	Discordant	Discordant
Z-130	0	0.200313	965.473	152.812	0.68683	22.3185	3.28129	0.0586238	7.92747	0.362011	8.57973	0.0448059	3.28129	0.382447	282.554	9.07116	313.715	23.159	552.199	899.763	9.93305	48.8312	12.0892	282.509	9.07119	9.76667
Z-131	0	0.217455	4485.24	549.246	0.476791	15.8721	2.94897	0.0544414	4.87274	0.472725	5.69562	0.0630038	2.94897	0.517761	393.867	11.2673	393.069	18.5655	388.357	108.055	-0.203009	-1.41894	-0.226473	393.806	11.2061	12.1538
Z-132	0	3.48634	174.818	33.8132	0.676203	22.6763	3.37271	0.0177732	11.8724	0.10802	12.3421	0.0440989	3.37271	0.273267	278.19	9.18295	104.153	12.218	0	18.4656	-167.098	108.711	-81.8298	213.371	7.97206	8.17927
Z-133	0	0.045129	20676.7	110.303	1.74794	2.08109	2.64195	0.163498	3.89542	10.8276	4.70683	0.480517	2.64195	0.561302	2529.52	55.2762	2508.44	43.7787	2491.41	65.1568	-0.840241	-1.52947	-0.941128	2513.51	42.0177	45.6162
Z-134	0	0.544069	5486.4	417.734	1.13301	12.7004	3.53993	0.0664724	4.72638	0.721334	5.90507	0.0787377	3.53993	0.599473	488.584	16.6564	551.454	25.1313	820.399	210.143	11.4008	40.4456	15.0692	Discordant	Discordant	Discordant
Z-135	0	0.0881033	1240.57	130.877	0.652795	15.7931	2.95223	0.0612088	5.97702	0.534145	6.66637	0.0633188	2.95223	0.442854	395.777	11.3328	434.557	23.5716	645.664	267.265	8.92384	38.7023	11.2451	Discordant	Discordant	Discordant
Z-136	0	0.23774	5494.94	664.329	0.580017	15.2437	4.13109	0.0538293	4.63503	0.486675	6.20882	0.0656007	4.13109	0.665359	409.597	16.3945	402.642	20.6406	362.912	94.8445	-1.72718	-12.8641	-1.72843	408.319	16.1411	16.8514
Z-137	0	0.340953	2867.55	357.852	0.684874	15.9887	3.7951	0.051785	4.53844	0.446378	5.9161	0.0625442	3.7951	0.641487	391.08	14.4006	374.74	18.5411	274.906	81.6523	-4.36028	-42.2592	-4.25243	388.01	14.1538	14.8787
Z-138	0	0.0560658	24517.5	108.388	0.654608	1.99334	3.35951	0.185517	3.71687	12.8266	5.01013	0.50167	3.35951	0.670543	2620.97	72.3499	2667	47.2268	2702.08	62.2289	1.72602	3.0019	2.15915	2667.77	47.1487	50.4964
Z-139	0	0.685661	607.463	126.93	0.37988	26.5073	3.22235	0.0458607	8.51257	0.238445	9.10206	0.0377255	3.22235	0.354024	238.719	7.55168	217.146	17.7961	0	100.366	-9.93484	2324.36	-10.1891	237.889	7.52573	8.04233
Z-140	0	0.282425	1490.43	153.791	1.86458	14.4006	2.36002	0.054502	5.50497	0.521608	5.98952	0.0694415	2.36002	0.394024	432.79	9.87861	426.225	20.8509	390.851	113.748	-1.54038	-10.7302	-1.79142	432.492	9.83924	11.0774
Z-141	0	0.232434	4978.3	610.26	0.503387	15.804	4.21017	0.051685	4.46648	0.450722	6.13799	0.063275	4.21017	0.68592	395.512	16.1512	377.785	19.3657	270.476	79.3043	-4.69239	-46.2279	-4.34287	391.207	15.7856	16.4504
Z-142	0	1.13512	22621.6	1355.02	0.279361	15.4335	3.93891	0.0763169	10.0608	0.681507	10.8043	0.0647943	3.93891	0.364567	404.717	15.4513	527.685	44.4916	1102.51	843.591	23.3033	63.2912	33.8521	Discordant	Discordant	Discordant
Z-143	0	0.175806	1760.99	215.422	0.532644	16.1858	3.3882	0.0524721	6.40344	0.446792	7.24458	0.0617825	3.3882	0.467687	386.456	12.7092	375.03	22.7204	305.065	122.39	-3.04669	-26.6801	-3.35883	385.664	12.6337	13.4323
Z-144	0	0.0846721	38790.2	353.268	1.45899	2.80018	3.01174	0.124623	3.92397	6.13372	4.94652	0.35712	3.01174	0.608859	1968.51	51.0895	1995.06	43.2116	2022.66	70.586	1.33075	2.67712	1.42492	1987.02	41.5816	44.5675
Z-145	0	0.0155287	8703.96	113.975	0.493611	3.36328	4.14448	0.10466	4.35344	4.28872	6.01075	0.297329	4.14448	0.689511	1678.05	61.2315	1691.2	49.5314	1707.52	80.9737	0.777527	1.72604	0.781928	1688.8	48.9197	51.0647
Z-146	0	0.0404741	1768.77	212.102	0.40209	15.7381	3.20308	0.0532047	5.30847	0.465919	6.19996	0.06354	3.20308	0.516629	397.119	12.3362	388.366	20.0113	336.553	105.712	-2.25373	-17.9958	-2.46408	396.359	12.2461	13.115
Z-147	0	0.389158	2825.45	286.144	0.861763	14.7215	4.32136	0.0553297	5.29215	0.517987	6.83236	0.0679279	4.32136	0.632485	423.66	17.7193	423.806	23.6772	424.577	118.291	0.0343486	0.215879	0.0358107	423.683	17.524	18.2321
Z-149	0	0.164513	1758.12	208.849	0.904537	16.3418	3.68568	0.0541497	6.02865	0.456677	7.06603	0.0611929	3.68568	0.521605	382.876	13.7007	381.945	22.4969	376.281	133.586	-0.243875	-1.75281	-0.272786	382.812	13.6285	14.379
Z-150	0	0.0674102	4336.25	376.914	0.533309	12.4878	3.81041	0.0572401	5.60004	0.631725	6.77346	0.0800784	3.81041	0.56255	496.591	18.2117	497.17	26.6331	499.86	124.013	0.11655	0.654046	0.130131	496.662	18.0193	18.9298
